# Supplementary material for: La(OTf)3 facilitated self-condensation of 2-indolylmethanol: construction of highly substituted indeno[1,2-b]indoles
Source: Royal Society of Chemistry journal article supplement (doi:10.1039/d1ob01517f), 2021-01-01
Supplement: d1ob01517f1.pdf [file d1ob01517f1.pdf]

## **La(OTf)<sub>3</sub> Facilitated Self-condensation of 2-Indolylmethanol:**

### **Construction of Highly Substituted Indeno[1,2-*b*]indoles**

Zhicong Tang, Gang Hong, Chen Hu, Qi Wang, Yi Zhong, Yu Gong, Peng Yang and Limin Wang\*

\* *Key Laboratory for Advanced Materials and Institute of Fine Chemicals, East China University of Science and Technology, 130 Meilong Road, Shanghai 200237, P. R. China. Fax & Tel: +86-21-64253881. Email:*

[wanglimin@ecust.edu.cn](mailto:wanglimin@ecust.edu.cn)

## **Contents**

|                                                                                     |     |
|-------------------------------------------------------------------------------------|-----|
| <b>Experimental Section</b> .....                                                   | S2  |
| <b>1.1 General Experimental Procedures</b> .....                                    | S2  |
| <b>1.2 Control experiments</b> .....                                                | S3  |
| <b>1.3 Characterization Data of Products</b> .....                                  | S4  |
| <b>Copies of <sup>1</sup>H NMR, <sup>13</sup>C NMR and <sup>19</sup>F NMR</b> ..... | S14 |
| <b>Crystallographic Data for Compounds 3c &amp; 3j</b> .....                        | S29 |



## Experimental Section

All reactions were carried out under air unless otherwise noted. Commercial reagents were used as received without additional purification unless otherwise noted. 2-Indolylmethanols were prepared according to the literature procedure.<sup>1</sup> Reactions were monitored by thin layer chromatography (TLC) using Silicycle glass-backed TLC plates with 250  $\mu\text{m}$  silica and F254 indicator. Visualization was accomplished by UV light.

$^1\text{H}$  NMR,  $^{13}\text{C}$  NMR, and  $^{19}\text{F}$  NMR spectra were recorded on a AM-500 Fourier transform NMR spectrometer at 400/600 MHz, 125/150 MHz, 376 MHz respectively. Chemical shifts are reported relative to the solvent resonance peak  $\delta$  2.50 (DMSO- $d_6$ ) for  $^1\text{H}$ ;  $\delta$  39.52 (DMSO- $d_6$ ) or 77.16 ( $\text{CDCl}_3$ ) for  $^{13}\text{C}$ . Data are reported as follows: chemical shift, multiplicity (s = singlet, d = doublet, t = triplet, q = quartet, b = broad singlet, m = multiplet), coupling constants, and number of protons. High resolution mass spectra were obtained using a VG autospec with an ionization mode of EI-TOF. Infrared spectra are reported in  $\text{cm}^{-1}$ . Column chromatography was performed with silica gel (50-63  $\mu\text{m}$  mesh particle size).

### 1.1 General Experimental Procedures

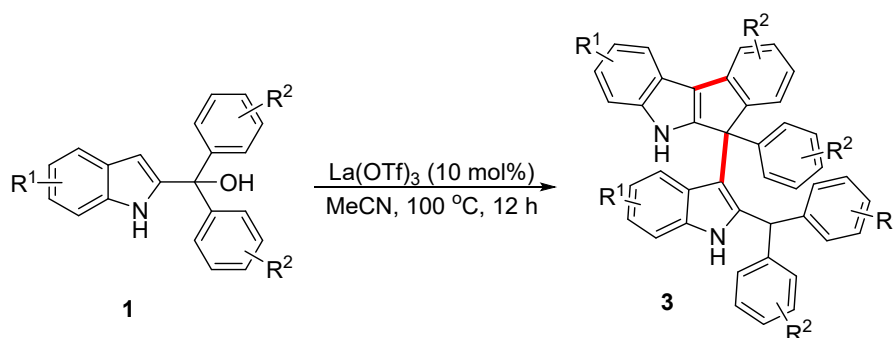

#### General Procedure A – Self-condensation of 2-Indolylmethanols.

2-Indolylmethanols **1** (0.5 mmol, 1 equiv), La(OTf)<sub>3</sub> (58.61 mg, 0.1 mmol, 0.2 equiv),

CH<sub>3</sub>CN (2 mL) and a stir bar were added to a sealed tube. After being stirred at 100 °C for indicated time, the mixture was evaporated under vacuum. The corresponding product **3** was isolated by silica gel column chromatography with a petroleum ether (PE)/dichloromethane mixture as eluent.

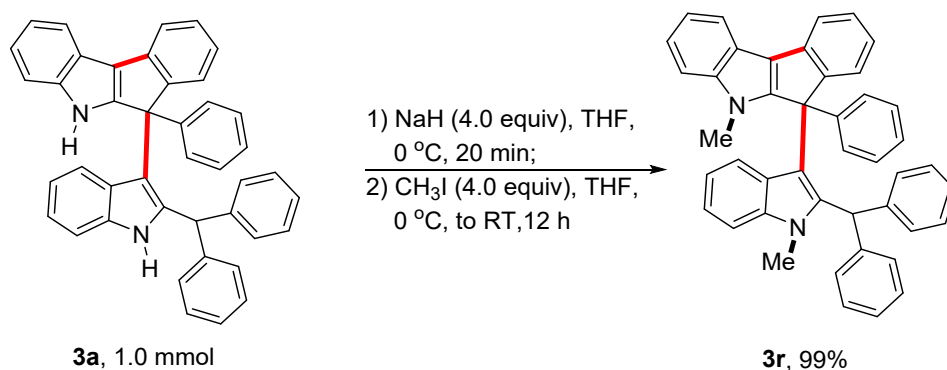

### General Procedure B – The methylation of the indeno[1,2-*b*]indole derivatives.

To a solution of Indeno[1,2-*b*]indoles **3a** (1.0 mmol) in dry tetrahydrofuran (THF; 25 mL), NaH (4.0 mmol) was added. After the mixture was stirred 20 min, CH<sub>3</sub>I (4.0 mmol) in 5 mL THF was added dropwise under 0 °C. The reaction mixture was stirred at room temperature for 12h. Then the reaction mixture was cooled to room temperature, diluted with 30 mL saturated NH<sub>4</sub>Cl solution, and extracted with EtOAc (3 × 30 mL). The organic layer dried over anhydrous MgSO<sub>4</sub> and concentrated in vacuo. The pure product **3r** was obtained by column chromatography on silica gel (Petroleum ether/ Dichloromethane = 100:50) with yield of 99%.

### 1.2 Control Experiments

Control experiment (Scheme 2a): (1*H*-indol-2-yl)diphenylmethanol **1a** (0.5 mmol, 149.7 mg, 1 equiv), La(OTf)<sub>3</sub> (58.61 mg, 0.1 mmol, 0.2 equiv), TEMPO (1.5 mmol, 234.4 mg, 3 equiv) or BHT (1.5 mmol, 330.5 mg, 3 equiv), CH<sub>3</sub>CN (2 mL) and a stir bar were added to a sealed tube. After being stirred at 100 °C for 8 h, the mixture was evaporated under vacuum. The corresponding product **3a** was isolated by silica gel column chromatography with a petroleum ether/dichloromethane mixture as eluent.

Control experiment (Scheme 2b): (1-methyl-1*H*-indol-2-yl)diphenylmethanol **1r** (0.5 mmol, 1 equiv), La(OTf)<sub>3</sub> (58.61 mg, 0.1 mmol, 0.2 equiv), CH<sub>3</sub>CN (2 mL) and a stir bar were added to a sealed tube. After being stirred at 100 °C for 8 h, only trace product was observed.

Control experiment (capture intermediate **4**): (*1H*-indol-2-yl)diphenylmethanol **1a** (0.5 mmol, 149.7 mg, 1 equiv), La(OTf)<sub>3</sub> (58.61 mg, 0.1 mmol, 0.2 equiv), CH<sub>3</sub>CN (2 mL) and a stir bar were added to a sealed tube. After being stirred at 100 °C for 1 h. Part of the mixture was analyzed by HRMS, and compound **4** was observed (calcd for C<sub>21</sub>H<sub>16</sub>N [M+H]<sup>+</sup> m/z = 282.1283; found, 282.1292).

#### Elemental Composition Report

Page 1

#### Single Mass Analysis

Tolerance = 10.0 PPM / DBE: min = -1.5, max = 50.0

Element prediction: Off

Number of isotope peaks used for i-FIT = 3

Monoisotopic Mass, Even Electron Ions

8 formula(e) evaluated with 1 results within limits (up to 50 best isotopic matches for each mass)

Elements Used:

C: 0-50 H: 0-99 N: 0-1

LM-WANG

WL-TT-331 23 (0.477) Cm (22:25)

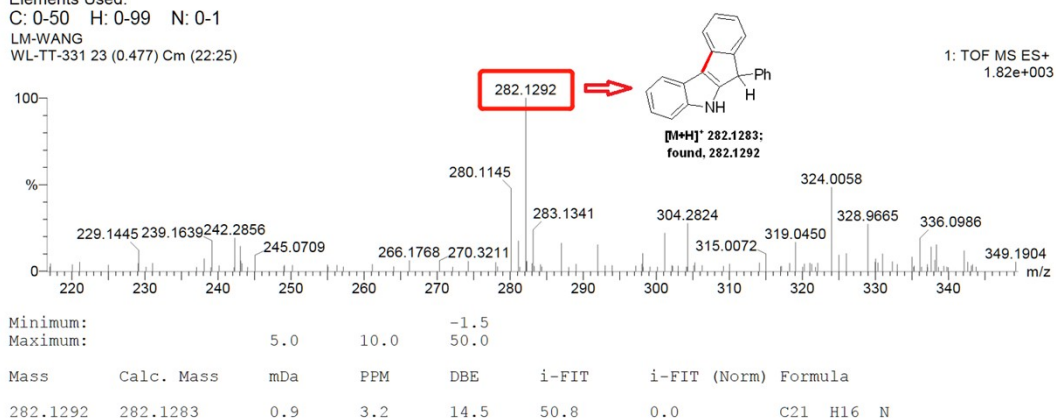

Figure S1. The HRMS spectrum of the reaction mixture

### 1.3 Characterization Data of Products

#### 6-(2-benzhydryl-1*H*-indol-3-yl)-6-phenyl-5,6-dihydroindeno[2,1-*b*]indole (**3a**)

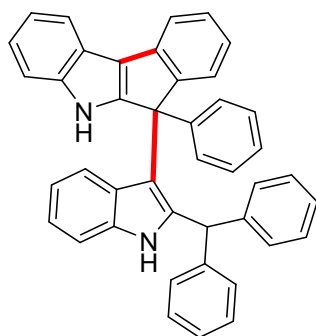

General procedure A was followed using **1a** (149.2 mg, 0.5 mmol), La(OTf)<sub>3</sub> (58.61 mg, 0.1 mmol, 0.2 equiv), CH<sub>3</sub>CN (2 mL) at 100 °C for 12 h. Chromatography (30% DCM/PE) afforded **3a** in 94% yield (130.7 mg) as a white solid (mp 272-274 °C): <sup>1</sup>H NMR (600 MHz, DMSO-*d*<sub>6</sub>) δ 11.53 (s, 1H), 10.54 (s, 1H), 7.89 (d, *J* = 7.3 Hz, 1H), 7.61 (s, 2H), 7.39 - 7.32 (m, 3H), 7.27 (d, *J* = 4.9 Hz, 4H), 7.20 (t, *J* = 8.0 Hz, 2H),

7.17 – 7.10 (m, 4H), 7.02 – 6.91 (m, 5H), 6.87 – 6.72 (m, 4H), 6.44 (s, 2H), 4.64 (s, 1H);  $^{13}\text{C}$  NMR (150 MHz,  $\text{DMSO-}d_6$ )  $\delta$  153.5, 151.4, 143.7, 142.2, 141.1, 138.2, 137.0, 136.5, 129.0, 128.5, 127.9, 127.4, 127.2, 126.1, 125.2, 122.7, 121.3, 120.7, 120.2, 119.2, 118.7, 118.5, 117.4, 112.8, 111.5, 56.1, 46.9; IR (film) 3393, 3056, 1724, 1599, 1447, 777, 737, 697  $\text{cm}^{-1}$ ; HRMS (EI-TOF) calcd for  $\text{C}_{42}\text{H}_{30}\text{N}_2$   $[\text{M}]^+$   $m/z$  = 562.2409; found, 562.2411.

**6-(2-benzhydryl-5-bromo-1*H*-indol-3-yl)-2-bromo-6-phenyl-5,6-dihydroindeno[2,1-*b*]indole (3b)**

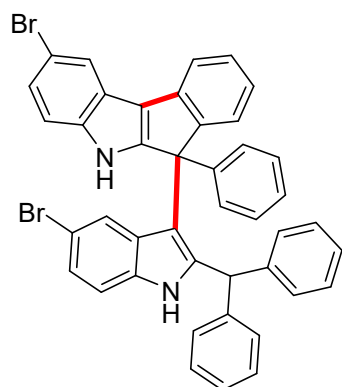

General procedure A was followed using **1b** (189.1 mg, 0.5 mmol),  $\text{La}(\text{OTf})_3$  (58.61 mg, 0.1 mmol, 0.2 equiv),  $\text{CH}_3\text{CN}$  (2 mL) at 100 °C for 12 h. Chromatography (30% DCM/PE) afforded **3b** in 88% yield (158.4 mg) as a white solid (mp 264–267 °C);  $^1\text{H}$  NMR (400 MHz,  $\text{DMSO-}d_6$ )  $\delta$  11.74 (s, 1H), 10.77 (s, 1H), 8.08 (s, 1H), 7.70 (s, 1H), 7.32 (s, 4H), 7.28 – 7.18 (m, 7H), 7.05 (d,  $J$  = 9.0 Hz, 6H), 6.86 (m, 2H), 6.61 (m, 2H), 6.48 – 6.25 (m, 2H), 4.57 (s, 1H).  $^{13}\text{C}$  NMR (150 MHz,  $\text{DMSO-}d_6$ )  $\delta$  154.3, 151.1, 142.8, 141.6, 139.8, 138.8, 137.3, 135.1, 128.6, 128.4, 127.9, 127.6, 127.4, 127.0, 126.2, 125.2, 123.8, 123.1, 122.7, 121.5, 119.1, 117.2, 114.6, 113.3, 112.7, 111.3, 55.7, 46.8; IR (film) 3403, 3057, 2922, 1600, 1490, 1466, 742, 700  $\text{cm}^{-1}$ ; HRMS (EI-TOF): calcd for  $\text{C}_{42}\text{H}_{28}\text{Br}_2\text{N}_2$   $[\text{M}]^+$   $m/z$  = 718.0619; found, 718.0610.

**6-(2-benzhydryl-5-chloro-1*H*-indol-3-yl)-2-chloro-6-phenyl-5,6-dihydroindeno[2,1-*b*]indole (3c)**

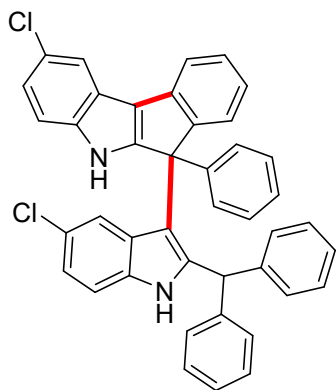

General procedure A was followed using **1c** (167.0 mg, 0.5 mmol), La(OTf)<sub>3</sub> (58.61 mg, 0.1 mmol, 0.2 equiv), CH<sub>3</sub>CN (2 mL) at 100 °C for 12 h. Chromatography (30% DCM/PE) afforded **3c** in 83% yield (130.8 mg) as a white solid (mp 235-237 °C): <sup>1</sup>H NMR (400 MHz, DMSO-*d*<sub>6</sub>) 11.77 (s, 1H), 10.80 (s, 1H), 7.99 (s, 1H), 7.71 (s, 1H), 7.58 (s, 1H), 7.47 (dd, *J* = 8.8, 5.0 Hz, 1H), 7.44 - 7.28 (m, 6H), 7.22 (t, *J* = 7.5 Hz, 2H), 7.19 - 7.11 (m, 2H), 7.03 (d, *J* = 15.9 Hz, 5H), 6.88 (d, *J* = 11.2 Hz, 2H), 6.67 (s, 2H), 6.46 (s, 1H), 6.26 (s, 1H), 4.63 (s, 1H); <sup>13</sup>C NMR (150 MHz, DMSO-*d*<sub>6</sub>) δ 154.5, 151.1, 142.8, 141.6, 139.5, 139.1, 137.4, 134.9, 128.8, 128.6, 128.0, 127.7, 127.5, 126.8, 126.3, 125.3, 124.8, 123.2, 122.1, 121.3, 120.7, 120.0, 119.2, 118.5, 114.2, 112.9, 55.8, 46.9; IR (film) 3487, 3396, 3061, 2920, 1597, 1443, 799, 733, 696 cm<sup>-1</sup>; HRMS (EI-TOF): calcd for C<sub>42</sub>H<sub>28</sub>Cl<sub>2</sub>N<sub>2</sub> [M]<sup>+</sup> *m/z* = 630.1630; found, 630.1603.

**6-(2-benzhydryl-5-fluoro-1*H*-indol-3-yl)-2-fluoro-6-phenyl-5,6-dihydroindeno[2,1-*b*]indole (**3d**)**

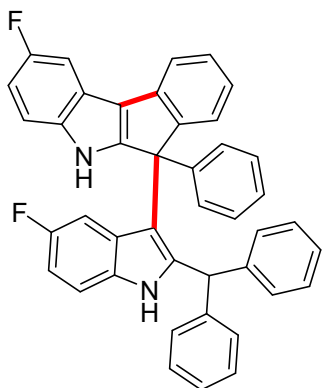

General procedure A was followed using **1d** (158.7 mg, 0.5 mmol), La(OTf)<sub>3</sub> (58.61 mg, 0.1 mmol, 0.2 equiv), CH<sub>3</sub>CN (2 mL) at 100 °C for 12 h. Chromatography (30% DCM/PE) afforded **3d** in 92% yield (137.6 mg) as a white solid (mp 206-208 °C): <sup>1</sup>H NMR (400 MHz, DMSO-*d*<sub>6</sub>) δ 11.64 (s, 1H), 10.64 (s, 1H), 7.67 (d, *J* = 10.7 Hz, 4H),

7.36 – 7.26 (m, 7H), 7.20 (t,  $J = 7.5, 1.1$  Hz, 3H), 7.06 (s, 4H), 7.00 – 6.91 (m, 2H), 6.80 (d,  $J = 9.0$  Hz, 3H), 6.71 – 6.59 (m, 1H), 6.43 (d,  $J = 7.1$  Hz, 1H), 4.61 (s, 1H);  $^{13}\text{C}$  NMR (150 MHz,  $\text{DMSO-}d_6$ )  $\delta$  158.5, 157.1, 157.0, 155.6, 143.0, 141.8, 137.6, 133.1, 128.7, 128.5, 128.1, 127.7, 127.5, 126.3, 125.4, 123.1, 121.2, 119.0, 117.8, 113.7 (d,  $J = 9.8$  Hz), 112.4 (d,  $J = 9.8$  Hz), 109.3 (d,  $J = 26.1$  Hz), 108.9 (d,  $J = 25.6$  Hz), 104.3 (d,  $J = 24.2$  Hz), 55.9, 47.1;  $^{19}\text{F}$  NMR (377 MHz,  $\text{DMSO-}d_6$ )  $\delta$  -123.38, -124.51; IR (film) 3435, 3398, 3048, 1481, 1447, 799, 752, 734, 699  $\text{cm}^{-1}$ ; HRMS (EI-TOF) calcd for  $\text{C}_{42}\text{H}_{28}\text{F}_2\text{N}_2$   $[\text{M}]^+$   $m/z = 598.2221$ ; found, 598.2224.

**6-(2-benzhydryl-5-methyl-1*H*-indol-3-yl)-2-methyl-6-phenyl-5,6-dihydroindeno[2,1-*b*]indole (3e)**

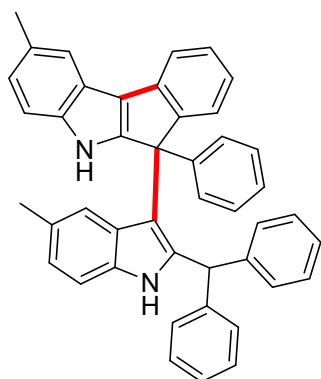

General procedure A was followed using **1e** (156.7 mg, 0.5 mmol),  $\text{La}(\text{OTf})_3$  (58.61 mg, 0.1 mmol, 0.2 equiv),  $\text{CH}_3\text{CN}$  (2 mL) at 100 °C for 12 h. Chromatography (30% DCM/PE) afforded **3e** in 81% yield (119.5 mg) as a yellow solid (mp 184-186 °C):  $^1\text{H}$  NMR (400 MHz,  $\text{DMSO-}d_6$ )  $\delta$  11.37 (s, 1H), 10.36 (s, 1H), 7.66 (s, 1H), 7.55 (s, 1H), 7.36 – 7.23 (m, 6H), 7.20 (d,  $J = 8.2$  Hz, 2H), 7.16 (t,  $J = 7.6$  Hz, 2H), 7.08 (s, 2H), 6.95 (d,  $J = 8.5$  Hz, 4H), 6.78 (s, 4H), 6.40 (s, 2H), 6.18 (s, 1H), 4.60 (s, 1H), 2.43 (s, 3H), 2.12 – 2.04 (m, 3H);  $^{13}\text{C}$  NMR (150 MHz,  $\text{DMSO-}d_6$ )  $\delta$  153.7, 151.6, 144.0, 142.3, 139.6, 138.3, 137.2, 135.1, 129.1, 128.8, 128.7, 128.6, 128.5, 128.2, 127.9, 127.5, 127.1, 126.6, 126.3, 125.3, 122.9, 122.2, 121.6, 119.0, 118.6, 117.0, 112.6, 111.2, 56.1, 47.0, 21.8, 21.5; IR (film) 3405, 2918, 1599, 1490, 1446, 740, 700  $\text{cm}^{-1}$ ; HRMS (EI-TOF) calcd for  $\text{C}_{44}\text{H}_{34}\text{N}_2$   $[\text{M}]^+$   $m/z = 590.2722$ ; found, 590.2727.

**6-(2-benzhydryl-6-bromo-1*H*-indol-3-yl)-3-bromo-6-phenyl-5,6-dihydroindeno[2,1-*b*]indole (3f)**



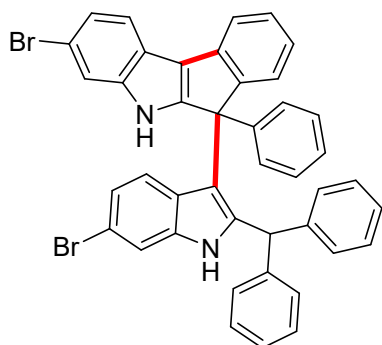

General procedure A was followed using **1f** (189.1 mg, 0.5 mmol), La(OTf)<sub>3</sub> (58.61 mg, 0.1 mmol, 0.2 equiv), CH<sub>3</sub>CN (2 mL) at 100 °C for 12 h. Chromatography (30% DCM/PE) afforded **3f** in 76% yield (136.9 mg) as a white solid (mp 272-274 °C): <sup>1</sup>H NMR (400 MHz, DMSO-*d*<sub>6</sub>) δ 11.67 (s, 1H), 10.65 (s, 1H), 7.81 (d, *J* = 8.5 Hz, 1H), 7.59 (d, *J* = 7.6 Hz, 1H), 7.46 (d, *J* = 1.9 Hz, 3H), 7.36 – 7.22 (m, 6H), 7.19 (t, *J* = 7.6 Hz, 2H), 7.06 (s, 5H), 6.87 – 6.73 (m, 3H), 6.68 (d, *J* = 8.4 Hz, 2H), 6.36 (s, 2H), 4.55 (s, 1H); <sup>13</sup>C NMR (150 MHz, DMSO-*d*<sub>6</sub>) δ 141.9, 137.5, 128.8, 128.4, 128.2, 127.8, 127.6, 126.5, 123.1, 121.5, 121.0, 119.1, 115.4, 114.1, 113.9, 113.7, 56.0, 47.0; IR (film) 3386, 3059, 1600, 1489, 1446, 741, 697 cm<sup>-1</sup>; HRMS (EI-TOF): calcd for C<sub>42</sub>H<sub>28</sub>Br<sub>2</sub>N<sub>2</sub> [M]<sup>+</sup> *m/z* = 718.0619; found, 718.0607.

**6-(2-benzhydryl-6-chloro-1*H*-indol-3-yl)-3-chloro-6-phenyl-5,6-dihydroindeno[2,1-*b*]indole (**3g**)**

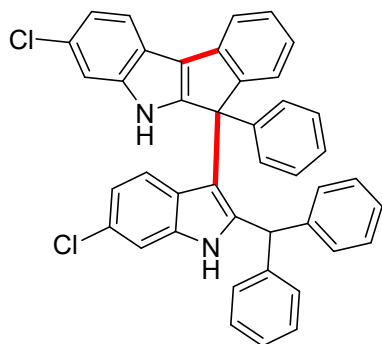

General procedure A was followed using **1g** (167.0 mg, 0.5 mmol), La(OTf)<sub>3</sub> (58.61 mg, 0.1 mmol, 0.2 equiv), CH<sub>3</sub>CN (2 mL) at 100 °C for 12 h. Chromatography (30% DCM/PE) afforded **3g** in 88% yield (139.1 mg) as a white solid (mp 300-302 °C): <sup>1</sup>H NMR (400 MHz, DMSO-*d*<sub>6</sub>) δ 11.66 (s, 1H), 10.67 (s, 1H), 7.86 (d, *J* = 8.4 Hz, 1H), 7.61 (s, 1H), 7.49 (s, 1H), 7.30 (dd, *J* = 9.5, 2.6 Hz, 7H), 7.20 (t, *J* = 7.5 Hz, 2H), 7.14 (dd, *J* = 8.4, 1.9 Hz, 2H), 7.06 (s, 4H), 6.83 (s, 2H), 6.68 (s, 2H), 6.38 (s, 3H), 4.57 (s, 1H); <sup>13</sup>C NMR (150 MHz, DMSO-*d*<sub>6</sub>) δ 141.5, 137.4, 128.7, 128.4, 128.0, 127.6,

127.4 , 126.4 , 125.8 , 125.6 , 123.2 , 120.5, 120.0 , 119.0, 118.8 , 117.6 , 112.4 , 111.0 , 55.9 , 46.9; IR (film) 3419 , 3387 , 3050 , 1600 , 1490 , 1445 , 796 , 742 , 598  $\text{cm}^{-1}$ ; HRMS (EI-TOF) calcd for  $\text{C}_{42}\text{H}_{28}\text{Cl}_2\text{N}_2$   $[\text{M}]^+$   $m/z = 630.1630$ ; found, 630.1619.

**6-(2-(bis(4-chlorophenyl)methyl)-1*H*-indol-3-yl)-9-chloro-6-(4-chlorophenyl)-5,6-dihydroindeno[2,1-*b*]indole (3h)**

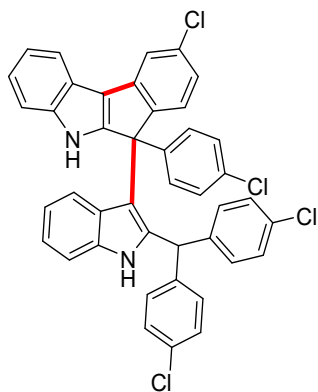

General procedure A was followed using **1h** (184.13 mg, 0.5 mmol),  $\text{La}(\text{OTf})_3$  (58.61 mg, 0.1 mmol, 0.2 equiv),  $\text{CH}_3\text{CN}$  (2 mL) at 100 °C for 12 h. Chromatography (30% DCM/PE) afforded **3h** in 86% yield (150.5 mg) as a yellow solid (mp 262-264 °C):  $^1\text{H}$  NMR (400 MHz,  $\text{DMSO}-d_6$ )  $\delta$  11.76 (s, 1H), 10.66 (s, 1H), 7.83 (d,  $J = 8.4$  Hz, 1H), 7.62 (d,  $J = 7.3$  Hz, 1H), 7.53 – 7.39 (m, 3H), 7.40 – 7.20 (m, 7H), 7.13 (m, 5H), 6.76 (m, 4H), 6.33 (m, 2H), 4.65 (m, 1H);  $^{13}\text{C}$  NMR (150 MHz,  $\text{DMSO}-d_6$ )  $\delta$  142.0 , 137.8 , 129.7 , 128.7 , 128.4 , 128.0 , 123.3 , 121.7 , 121.3 , 120.5 , 119.4 , 115.7 , 114.4 , 114.1 , 113.7 , 56.2 , 47.2; IR (film) 3432 , 2923 , 1592 , 1485 , 1089 , 1011 , 811 , 741  $\text{cm}^{-1}$ ; HRMS (EI-TOF): calcd for  $\text{C}_{42}\text{H}_{26}\text{Cl}_4\text{N}_2$   $[\text{M}]^+$   $m/z = 698.0850$ ; found, 698.0803.

**6-(2-(bis(4-fluorophenyl)methyl)-1*H*-indol-3-yl)-9-fluoro-6-(4-fluorophenyl)-5,6-dihydroindeno[2,1-*b*]indole (3i)**

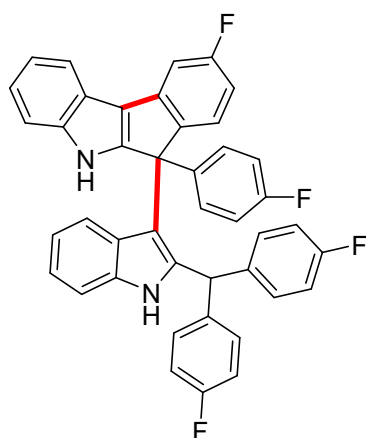

General procedure A was followed using **1i** (167.7 mg, 0.5 mmol),  $\text{La}(\text{OTf})_3$  (58.61 mg, 0.1 mmol, 0.2 equiv),  $\text{CH}_3\text{CN}$  (2 mL) at 100 °C for 12 h. Chromatography (30%

DCM/PE) afforded **3i** in 74% yield (117.4 mg) as a yellow solid (mp 202-204 °C): <sup>1</sup>H NMR (600 MHz, DMSO-*d*<sub>6</sub>) δ 11.84 (s, 1H), 10.45 (s, 1H), 7.90 (s, 1H), 7.76 (s, 1H), 7.44 – 7.39 (m, 2H), 7.35 (d, *J* = 8.1 Hz, 1H), 7.30 – 7.27 (m, 1H), 7.20 (dd, *J* = 6.2, 3.1 Hz, 1H), 7.18 – 7.11 (m, 3H), 7.09 (t, *J* = 8.9 Hz, 2H), 7.02 – 6.93 (m, 3H), 6.87 – 6.74 (m, 5H), 6.65 – 6.58 (m, 1H), 6.45 (s, 1H), 6.24 (s, 1H), 4.47 (s, 1H); <sup>13</sup>C NMR (150 MHz, DMSO-*d*<sub>6</sub>) δ 163.2, 162.2, 161.7, 161.6, 160.6, 160.1, 159.9, 146.5, 141.0, 134.0, 139.4, 137.9, 137.5, 136.4, 130.5, 130.2 (d, *J* = 8.3 Hz), 129.9, 127.3, 125.7, 121.7, 121.1, 120.8, 120.5, 119.4, 118.8, 116.7, 115.2, 114.9, 114.5, 112.8, 111.7, 108.5 (d, *J* = 22.9 Hz), 105.9 (d, *J* = 6.8 Hz), 105.8, 54.7, 45.4; <sup>19</sup>F NMR (376 MHz, DMSO-*d*<sub>6</sub>) δ -115.6, -116.6, -117.1; IR (film) 3447, 3058, 1890, 1600, 1501, 1222, 1155, 832, 815, 738 cm<sup>-1</sup>; HRMS (EI-TOF): calcd for C<sub>42</sub>H<sub>26</sub>F<sub>4</sub>N<sub>2</sub> [M]<sup>+</sup> *m/z* = 634.2032; found, 634.2035.

**6-(2-(bis(4-(trifluoromethyl)phenyl)methyl)-1*H*-indol-3-yl)-9-(trifluoromethyl)-6-(4-(trifluoromethyl)phenyl)-5,6-dihydroindeno[2,1-*b*]indole (**3j**)**

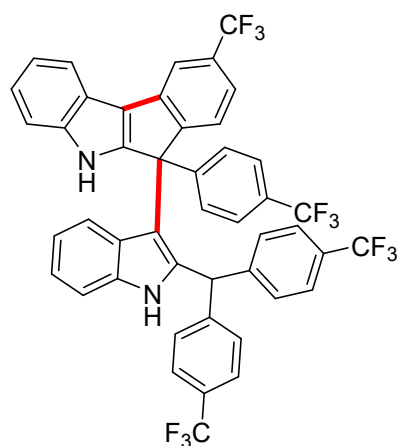

General procedure A was followed using **1j** (217.7 mg, 0.5 mmol), La(OTf)<sub>3</sub> (58.61 mg, 0.1 mmol, 0.2 equiv), CH<sub>3</sub>CN (2 mL) at 100 °C for 12 h. Chromatography (30% DCM/PE) afforded **3j** in 79% yield (164.8 mg) as an orange solid (mp 163-165 °C): <sup>1</sup>H NMR (400 MHz, DMSO-*d*<sub>6</sub>) δ 12.32 (s, 1H), 10.81 (s, 1H), 7.89 (s, 1H), 7.83 (d, *J* = 7.4 Hz, 1H), 7.70 (d, *J* = 7.9 Hz, 2H), 7.60 – 7.33 (m, 9H), 7.26 – 7.15 (m, 3H), 7.09 – 6.99 (m, 3H), 6.94 (s, 1H), 6.77 (s, 1H), 6.53 – 6.21 (m, 2H), 4.60 (s, 1H); <sup>13</sup>C NMR (150 MHz, Chloroform-*d*) δ 153.9, 147.1, 145.6, 144.6, 141.3, 136.7, 129.7, 129.2, 128.9, 128.7, 128.4, 128.2, 127.8, 127.6, 125.8, 125.5, 125.3, 125.1, 124.6, 123.7, 123.5, 123.3, 122.4, 121.4, 121.6 (d, *J* = 5.6 Hz), 121.5 (d, *J* = 5.6 Hz), 121.0

, 120.1 , 119.7 , 119.3 (d,  $J = 6.9$  Hz) , 117.1 , 114.6 , 113.0 , 112.5 (d,  $J = 11.3$  Hz) , 106.6 , 31.2 , 30.0;  $^{19}\text{F}$  NMR (377 MHz, DMSO- $d_6$ )  $\delta$  -58.93 , -60.18 , -61.11 , -61.25; IR (film) 3457 , 3061 , 2926, 1612 , 1450 , 1323 , 1113 , 1071 , 763 , 700  $\text{cm}^{-1}$ ; HRMS (EI-TOF): calcd for  $\text{C}_{46}\text{H}_{26}\text{F}_{12}\text{N}_2$   $[\text{M}]^+$   $m/z=834.1904$ ; found, 834.1902.

**6-(2-(di-*p*-tolylmethyl)-1*H*-indol-3-yl)-9-methyl-6-(*p*-tolyl)-5,6-dihydroindeno[2,1-*b*]indole (3k)**

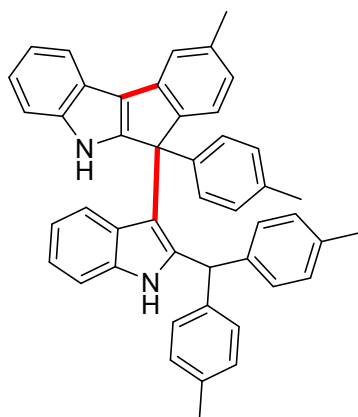

General procedure A was followed using **1k** (163.7 mg, 0.5 mmol),  $\text{La}(\text{OTf})_3$  (58.61 mg, 0.1 mmol, 0.2 equiv),  $\text{CH}_3\text{CN}$  (2 mL) at 100 °C for 12 h. Chromatography (30% DCM/PE) afforded **3k** in 76% yield (111.7 mg) as a yellow solid (mp 238-240 °C):  $^1\text{H}$  NMR (400 MHz, DMSO- $d_6$ )  $\delta$  11.47 (s, 1H), 10.35 (s, 1H), 7.82 (d,  $J = 6.5$  Hz, 1H), 7.35 (dd,  $J = 6.2, 2.8$  Hz, 2H), 7.30 (d,  $J = 8.2$  Hz, 2H), 7.15 – 7.08 (m, 4H), 7.08 – 7.03 (m, 3H), 6.96 – 6.84 (m, 4H), 6.77 – 6.44 (m, 6H), 6.25 (d,  $J = 18.2$  Hz, 1H), 4.51 (s, 1H), 2.29 (s, 3H), 2.24 (s, 9H);  $^{13}\text{C}$  NMR (150 MHz, DMSO- $d_6$ )  $\delta$  141.1 , 139.5 , 138.3 , 136.5 , 135.6 , 135.4 , 129.4 , 128.6 , 123.2 , 121.5 , 121.2 , 120.6 , 120.2 , 119.5 , 119.3 , 118.5 , 112.9 , 111.5 , 73.4 , 56.0, 55.6, 21.4, 21.0, 20.8; IR (film) 3403, 2919, 1689 , 1507, 1449, 805, 737  $\text{cm}^{-1}$ ; HRMS (EI-TOF): calcd for  $\text{C}_{46}\text{H}_{38}\text{N}_2$   $[\text{M}]^+$   $m/z=618.3035$ ; found, 618.3040.

**6-(2-(bis(4-(*tert*-butyl)phenyl)methyl)-1*H*-indol-3-yl)-9-(*tert*-butyl)-6-(4-(*tert*-butyl)phenyl)-5,6-dihydroindeno[2,1-*b*]indole (3l)**

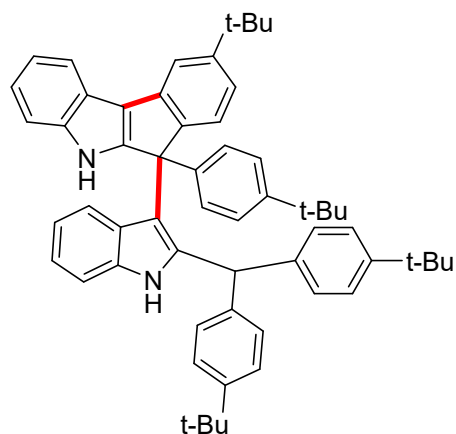

General procedure A was followed using **1l** (205.8 mg, 0.5 mmol), La(OTf)<sub>3</sub> (58.61 mg, 0.1 mmol, 0.2 equiv), CH<sub>3</sub>CN (2 mL) at 100 °C for 12 h. Chromatography (30% DCM/PE) afforded **3l** in 71% yield (139.7 mg) as a yellow solid (mp 230-232 °C): <sup>1</sup>H NMR (400 MHz, DMSO-*d*<sub>6</sub>) δ 11.52 (s, 1H), 10.57 (s, 1H), 8.07 – 7.81 (m, 1H), 7.81 – 7.57 (m, 1H), 7.48 – 7.21 (m, 7H), 7.21 (s, 6H), 6.88 (t, *J* = 6.9 Hz, 2H), 6.77 (dq, *J* = 17.3, 8.1 Hz, 2H), 6.69 – 6.18 (m, 4H), 4.91 – 4.29 (m, 1H), 1.42 – 1.08 (m, 36H); <sup>13</sup>C NMR (150 MHz, DMSO-*d*<sub>6</sub>) δ 150.2, 149.7, 139.8, 128.9, 126.5, 121.5, 120.8, 120.3, 119.8, 116.0, 113.1, 111.6, 73.5, 55.7, 34.9, 34.5, 31.9, 31.6; IR (film) 3046, 2956, 2865, 1611, 1453, 820, 739 cm<sup>-1</sup>; HRMS (EI-TOF): calcd for C<sub>58</sub>H<sub>62</sub>N<sub>2</sub> [M]<sup>+</sup> *m/z* = 786.4913; found, 786.4911.

**7-(2-(di(naphthalen-2-yl)methyl)-1H-indol-3-yl)-7-(naphthalen-2-yl)-7,8-dihydrobenzo[6,7]indeno[2,1-*b*]indole (3m)**

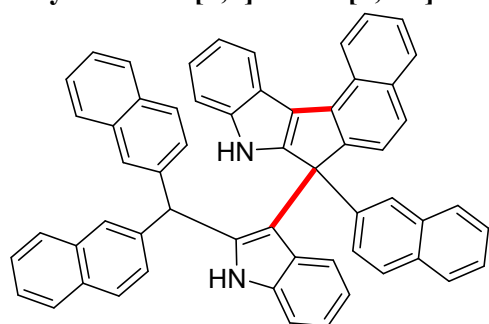

General procedure A was followed using **1m** (199.7 mg, 0.5 mmol), La(OTf)<sub>3</sub> (58.61 mg, 0.1 mmol, 0.2 equiv), CH<sub>3</sub>CN (2 mL) at 100 °C for 12 h. Chromatography (30% DCM/PE) afforded **3m** in 65% yield (123.9 mg) as a yellow solid (mp 302-304 °C): <sup>1</sup>H NMR (400 MHz, DMSO-*d*<sub>6</sub>) δ 12.10 (s, 1H), 10.79 (s, 1H), 8.85 – 8.59 (m, 1H), 8.29 (d, *J* = 8.1 Hz, 1H), 8.17 (d, *J* = 8.4 Hz, 1H), 8.00 – 7.95 (m, 1H), 7.91 (d, *J* = 8.1 Hz, 1H), 7.88 – 7.84 (m, 1H), 7.74 (t, *J* = 8.6 Hz, 3H), 7.65 (t, *J* = 8.2 Hz, 2H), 7.59 (t, *J*

= 7.6 Hz, 3H), 7.50 – 7.39 (m, 6H), 7.35 (dd, 4H), 7.30 – 7.10 (m, 6H), 7.07 (d,  $J$  = 6.7 Hz, 1H), 6.96 (t,  $J$  = 7.7 Hz, 1H), 6.88 (d,  $J$  = 7.1 Hz, 1H), 6.65 (s, 1H), 6.47 (s, 1H), 4.88 (s, 1H);  $^{13}\text{C}$  NMR (150 MHz,  $\text{DMSO-}d_6$ )  $\delta$  146.7, 141.3, 141.1, 139.2, 138.8, 137.0, 136.6, 133.2, 132.8, 132.2, 131.8, 129.7, 128.3, 128.2, 127.8, 127.5, 127.5, 127.4, 127.3, 127.2, 127.0, 126.7, 126.7, 126.5, 126.3, 126.0, 125.7, 125.5, 125.3, 125.2, 121.2, 120.5, 118.6, 117.2, 113.2, 111.6, 55.7, 48.6; IR (film) 3399, 3049, 2922, 1450, 800, 735  $\text{cm}^{-1}$ ; HRMS (EI-TOF) calcd for  $\text{C}_{58}\text{H}_{38}\text{N}_2$   $[\text{M}]^+$   $m/z$  = 762.3035; found, 762.3026.

**(S)-6-(2-benzhydryl-1-methyl-1*H*-indol-3-yl)-5-methyl-6-phenyl-5,6-dihydroindeno[2,1-*b*]indole (3r)**

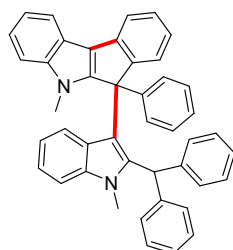

General procedure B was followed using **3a** (562.2 mg, 1.0 mmol), NaH (160.0 mg, 4.0 mmol, 4.0 equiv),  $\text{CH}_3\text{I}$  (567.8 mg, 4.0 mmol, 4.0 equiv), THF (30 mL) at 0 °C for 12 h. Chromatography (50% DCM/PE) afforded **3r** in 99% yield (292.4 mg) as a white solid (m283-285 °C):  $^1\text{H}$  NMR (600 MHz,  $\text{DMSO-}d_6$ )  $\delta$  8.16 – 7.89 (m, 2H), 7.76 – 7.70 (m, 1H), 7.51 (dd,  $J$  = 7.8, 4.2 Hz, 1H), 7.41 (d,  $J$  = 7.7 Hz, 1H), 7.36 – 7.28 (m, 2H), 7.27 – 7.18 (m, 3H), 7.13 (t,  $J$  = 7.5 Hz, 1H), 7.10 – 7.04 (m, 3H), 7.02 – 6.94 (m, 3H), 6.92 (d,  $J$  = 7.1 Hz, 1H), 6.88 (t,  $J$  = 7.5 Hz, 2H), 6.78 (t,  $J$  = 7.7 Hz, 1H), 6.71 (t,  $J$  = 7.6 Hz, 1H), 6.48 (d,  $J$  = 8.2 Hz, 1H), 6.39 (d,  $J$  = 7.4 Hz, 2H), 6.31 (d,  $J$  = 7.5 Hz, 2H), 5.20 (s, 1H), 3.08 (s, 3H), 3.00 (s, 3H);  $^{13}\text{C}$  NMR (150 MHz,  $\text{DMSO-}d_6/\text{CDCl}_3=1:1$ )  $\delta$  153.6, 153.2, 141.8, 141.1, 140.9, 139.0, 138.1, 137.4, 128.5, 128.2, 127.9, 127.7, 127.6, 127.3, 126.9, 125.8, 125.7, 124.2, 123.0, 121.7, 121.0, 120.8, 120.0, 119.1, 118.6, 118.0, 116.9, 110.1, 109.2, 56.5, 45.1, 32.1, 30.7; IR (film) 354, 2922, 1596, 1523, 1490, 1466, 757, 735, 693  $\text{cm}^{-1}$ ; HRMS (EI-TOF) calcd for  $\text{C}_{44}\text{H}_{34}\text{N}_2$   $[\text{M}]^+$   $m/z$  = 590.2722; found, 590.2766.

**References**

(a) H. H. Zhang, C. S. Wang, C. Li, G. J. Mei, Y. Li and F. Shi, *Angew. Chem., Int. Ed.* 2017, **56**, 116; (b) Z. Q. Zhu, Y. Shen, X. X. Sun, J. Y. Tao, J. X. Liu and F. Shi, *Adv.*

*Synth. Catal.* 2016, **358**, 3797.

Copies of  $^1\text{H}$  NMR,  $^{13}\text{C}$  NMR and  $^{19}\text{F}$  NMR

3a

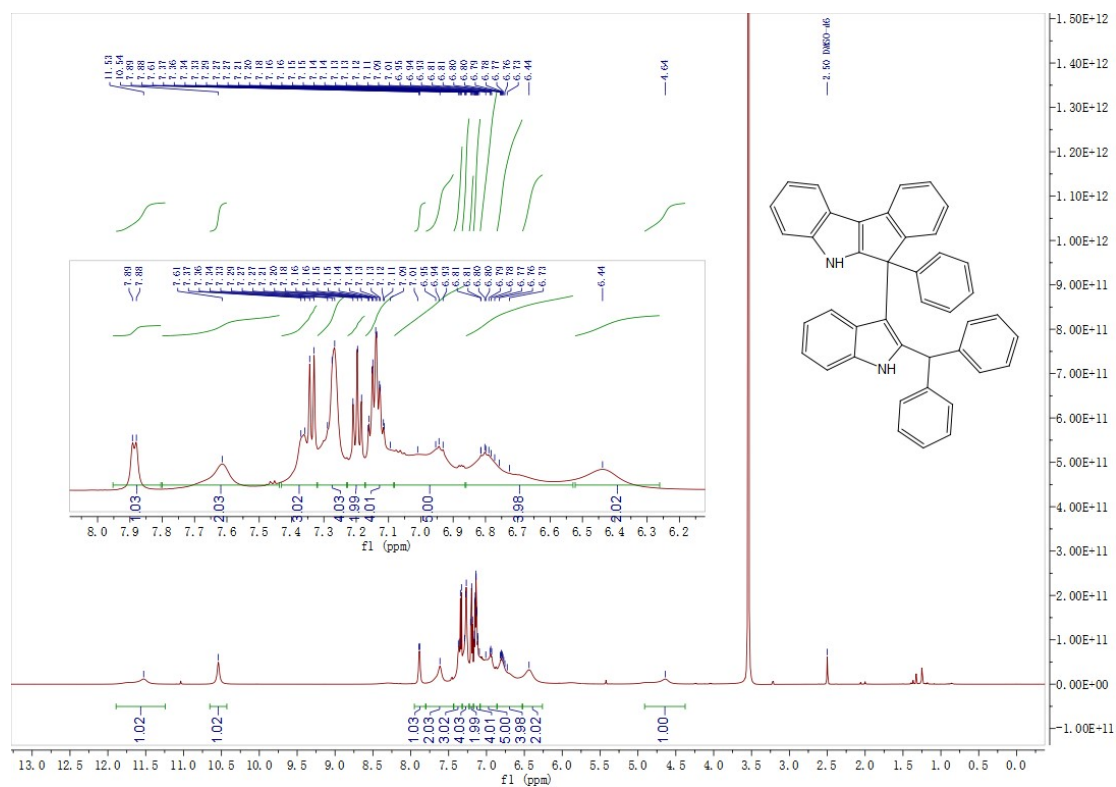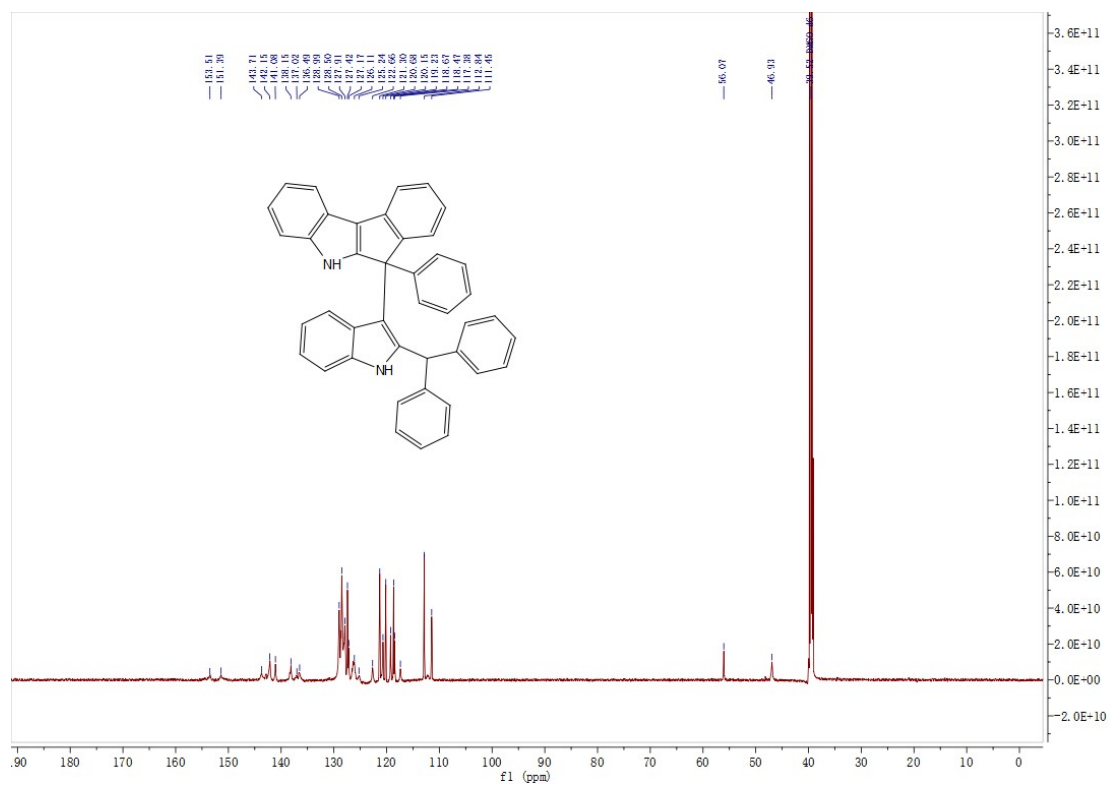



3b

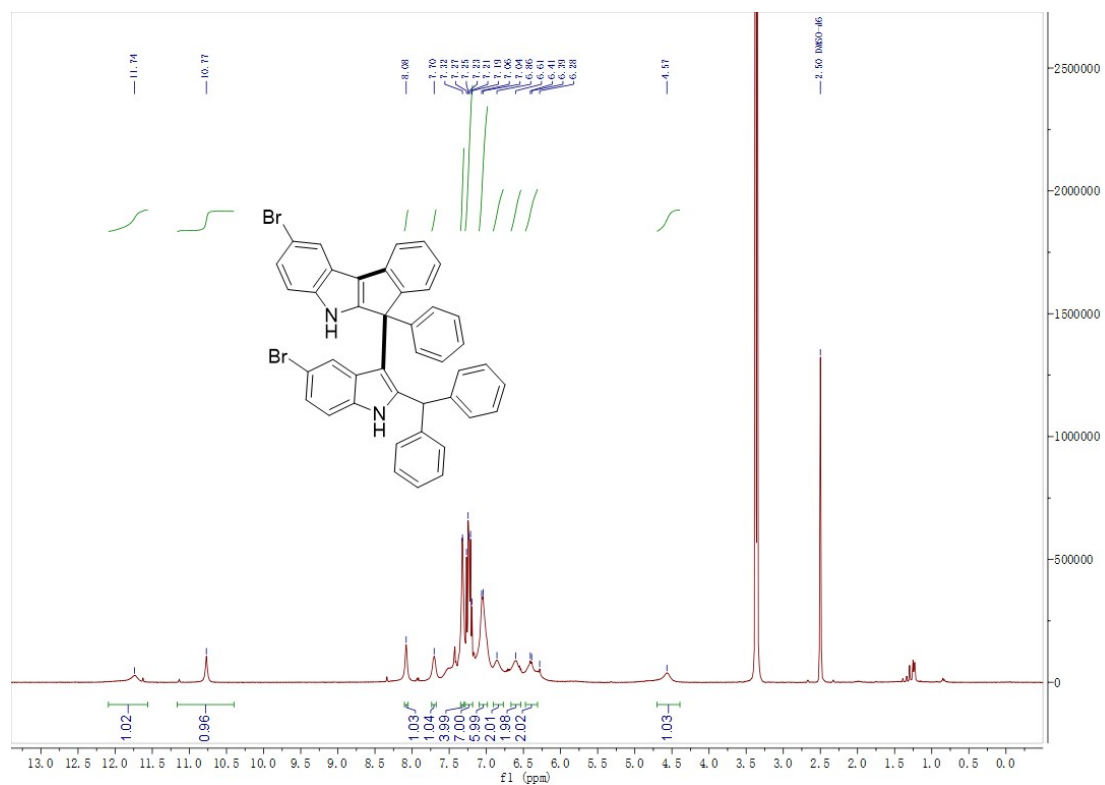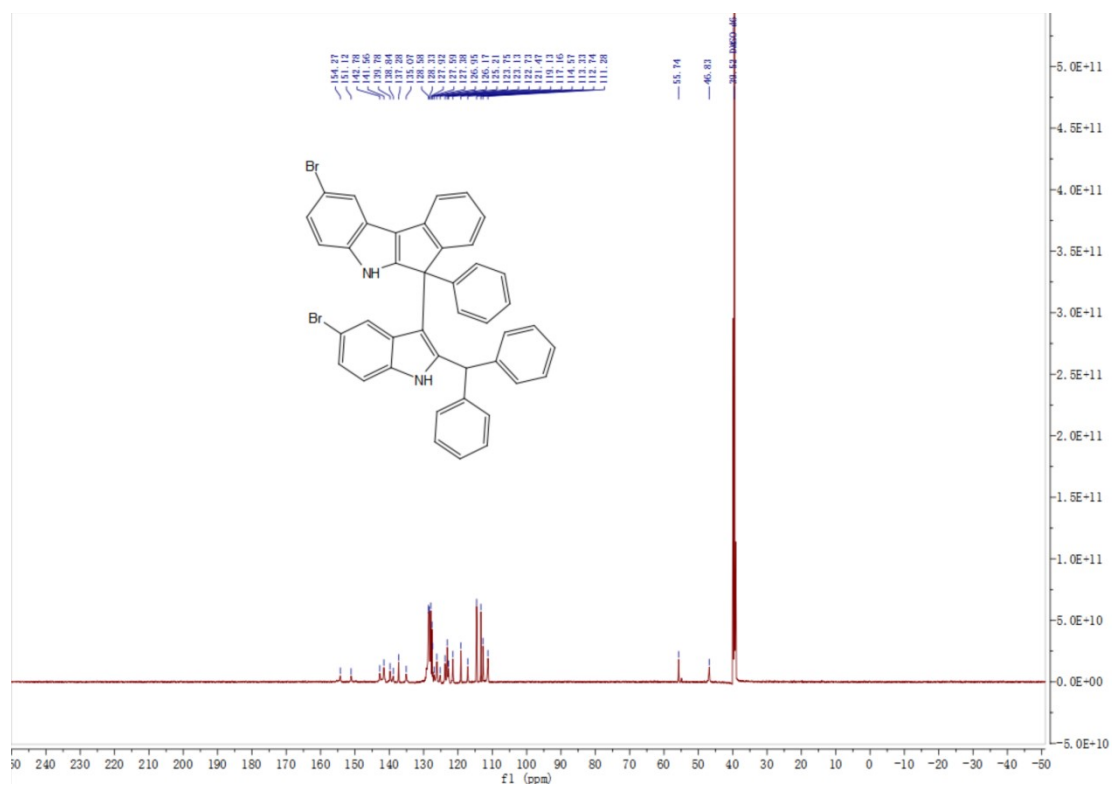



3d

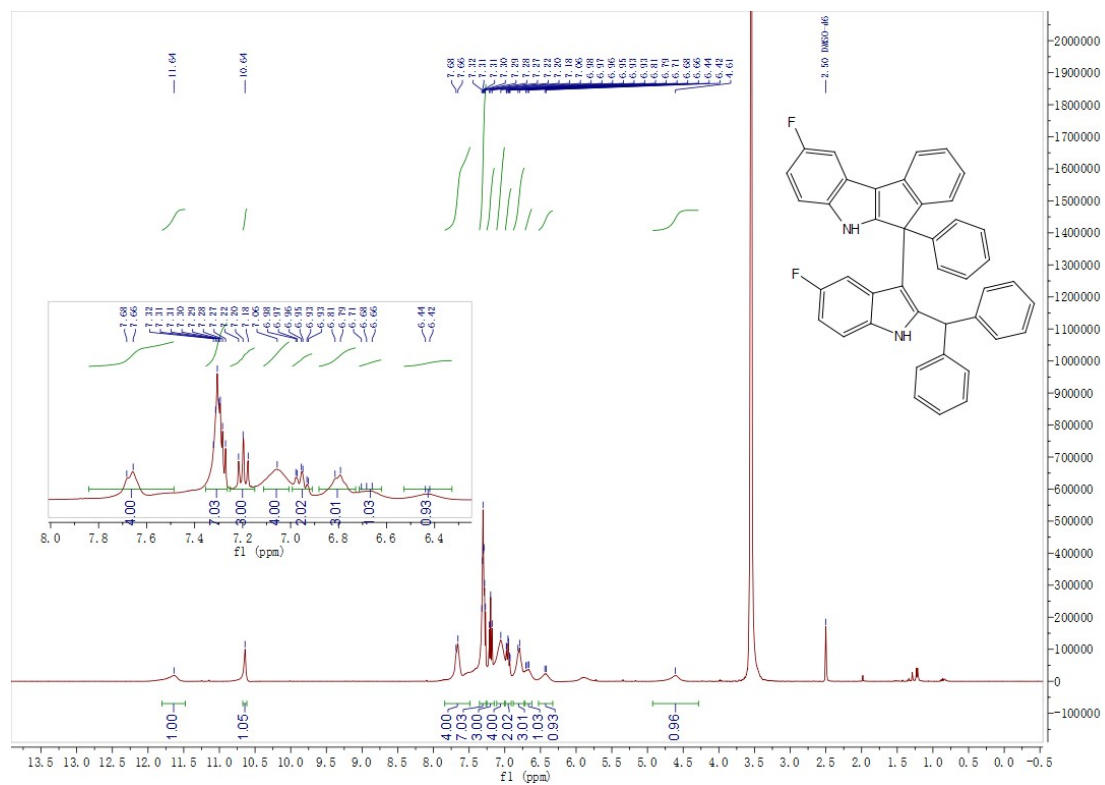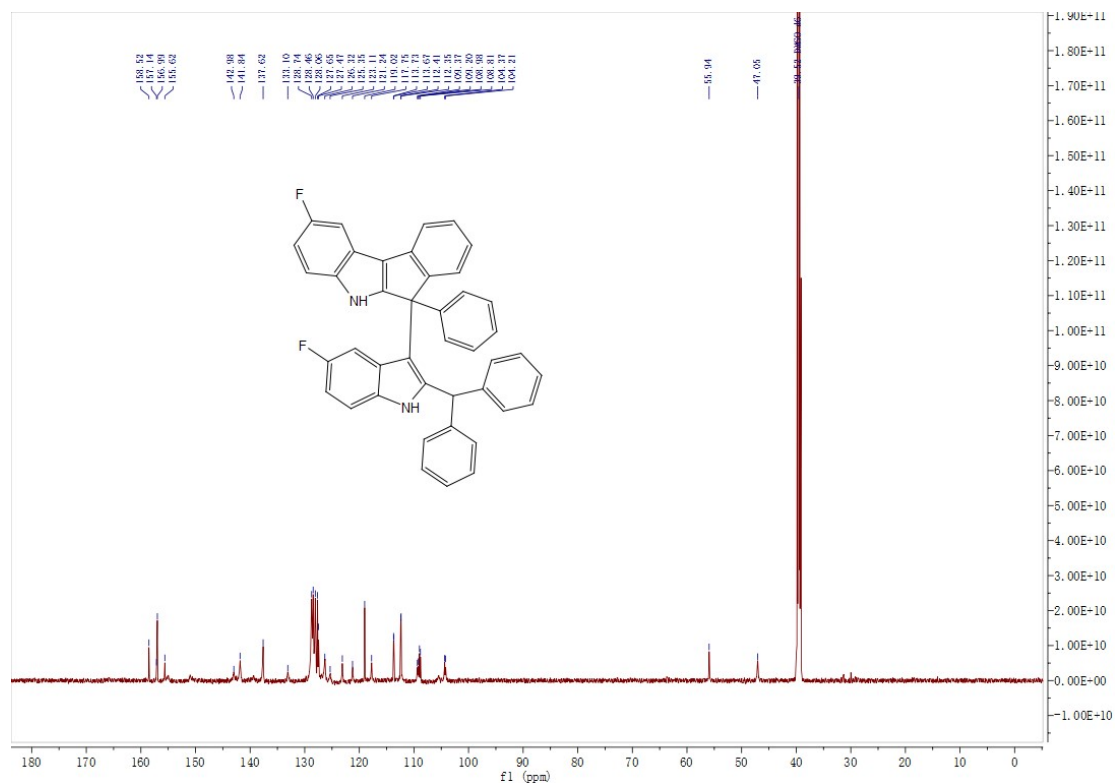

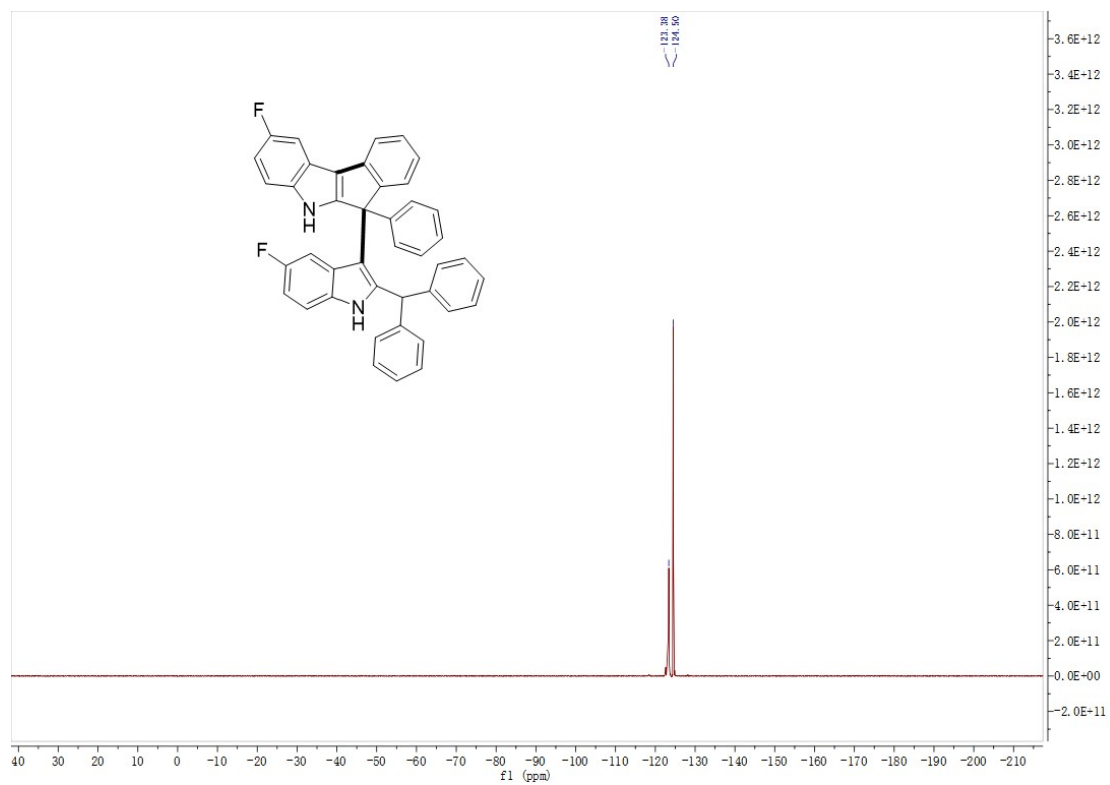

3e

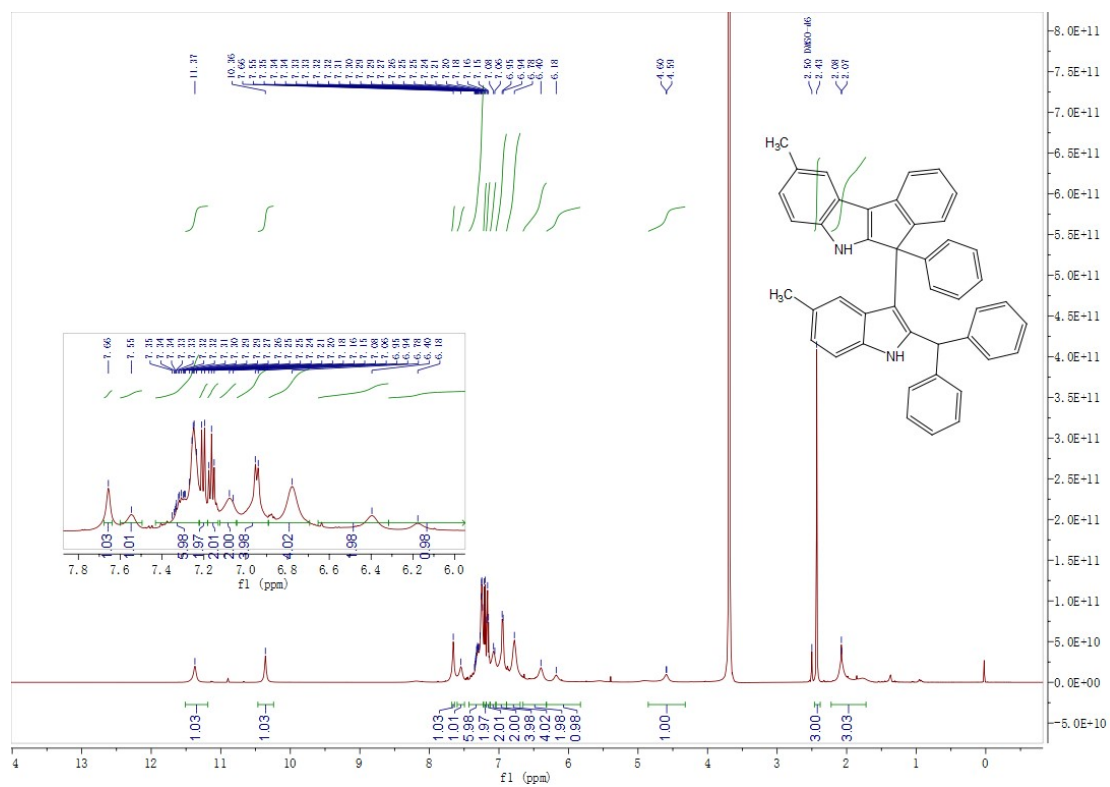

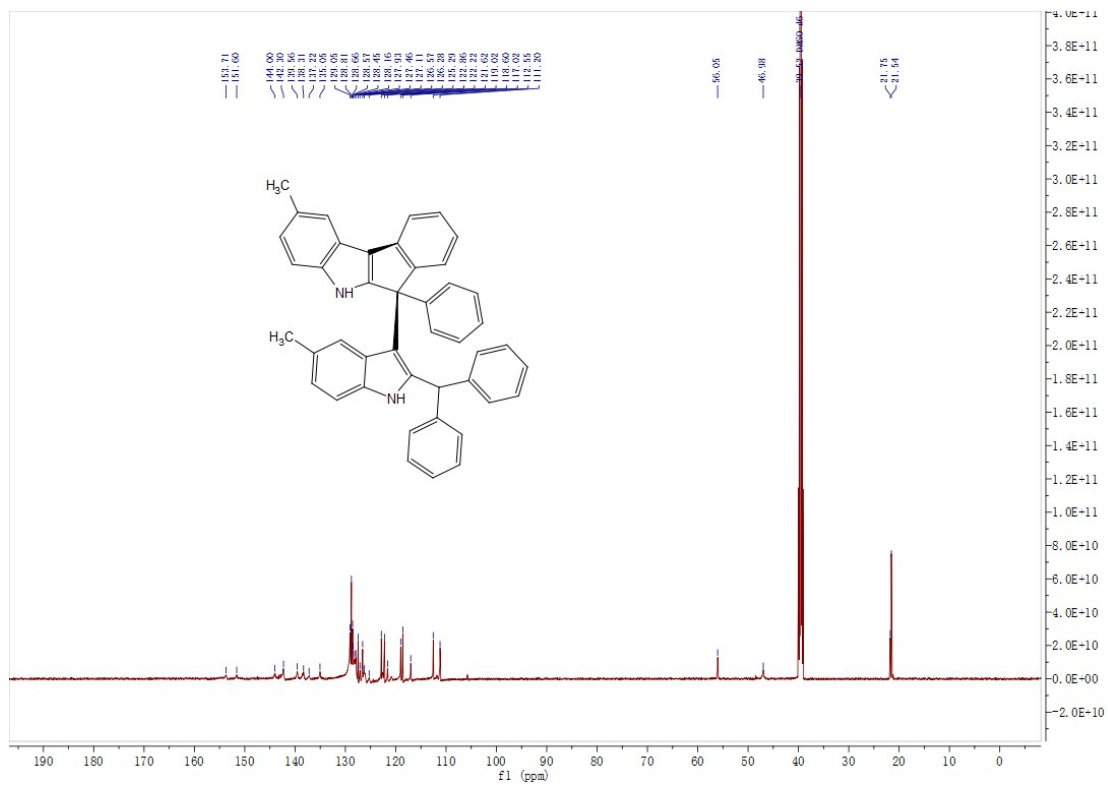

3f

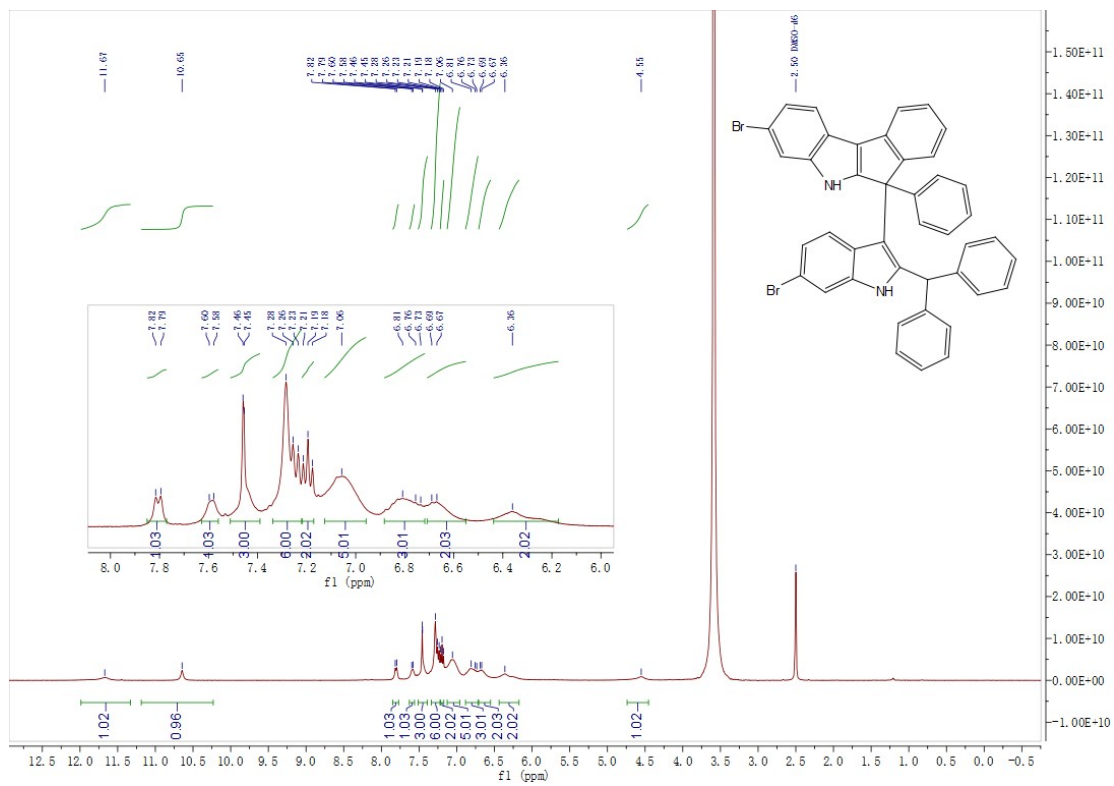

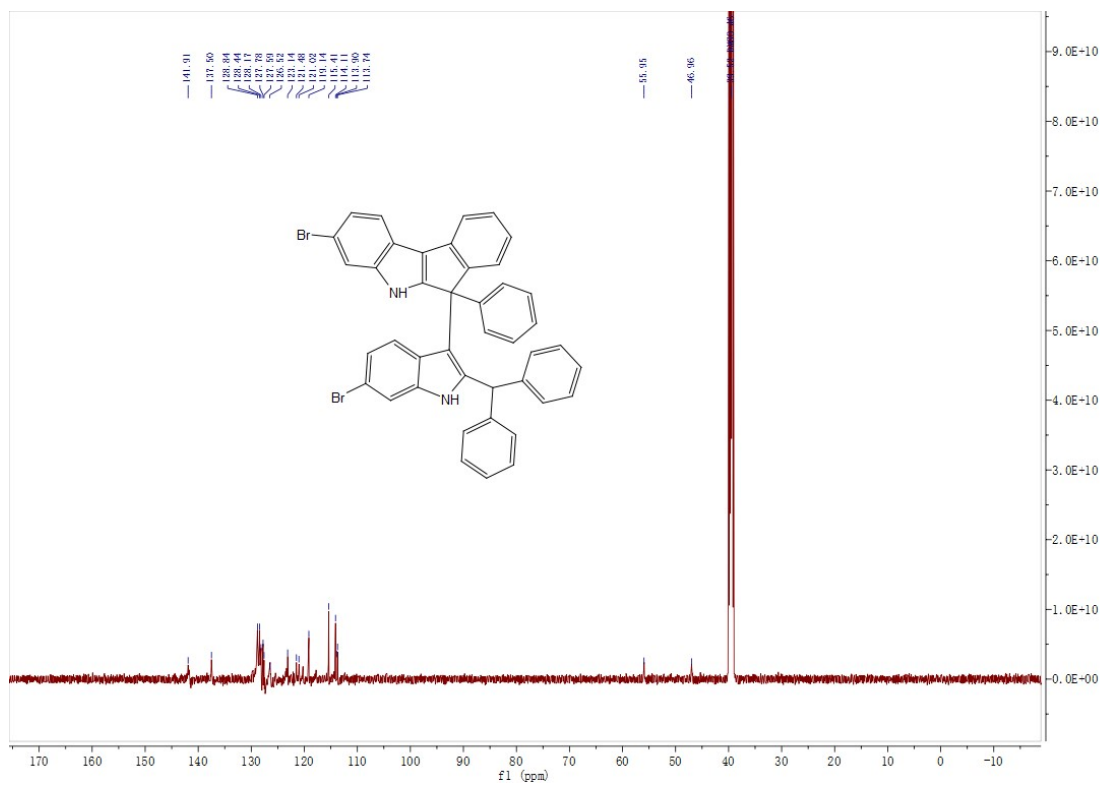

3g

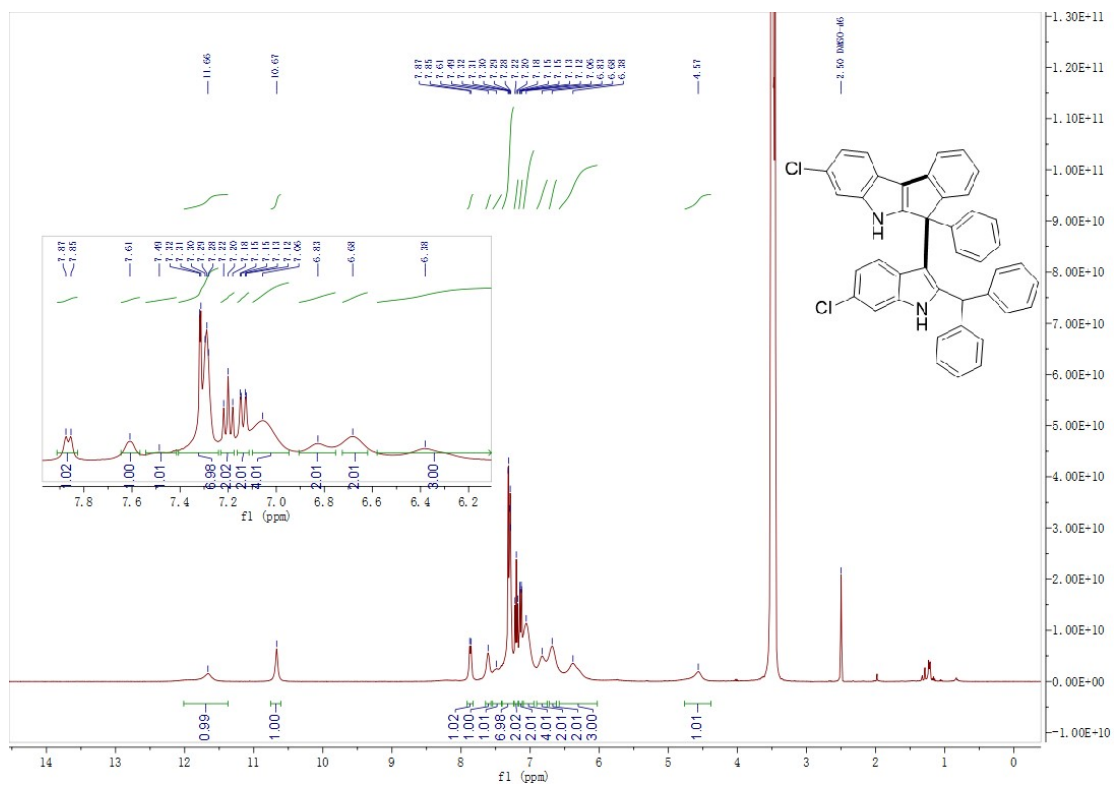

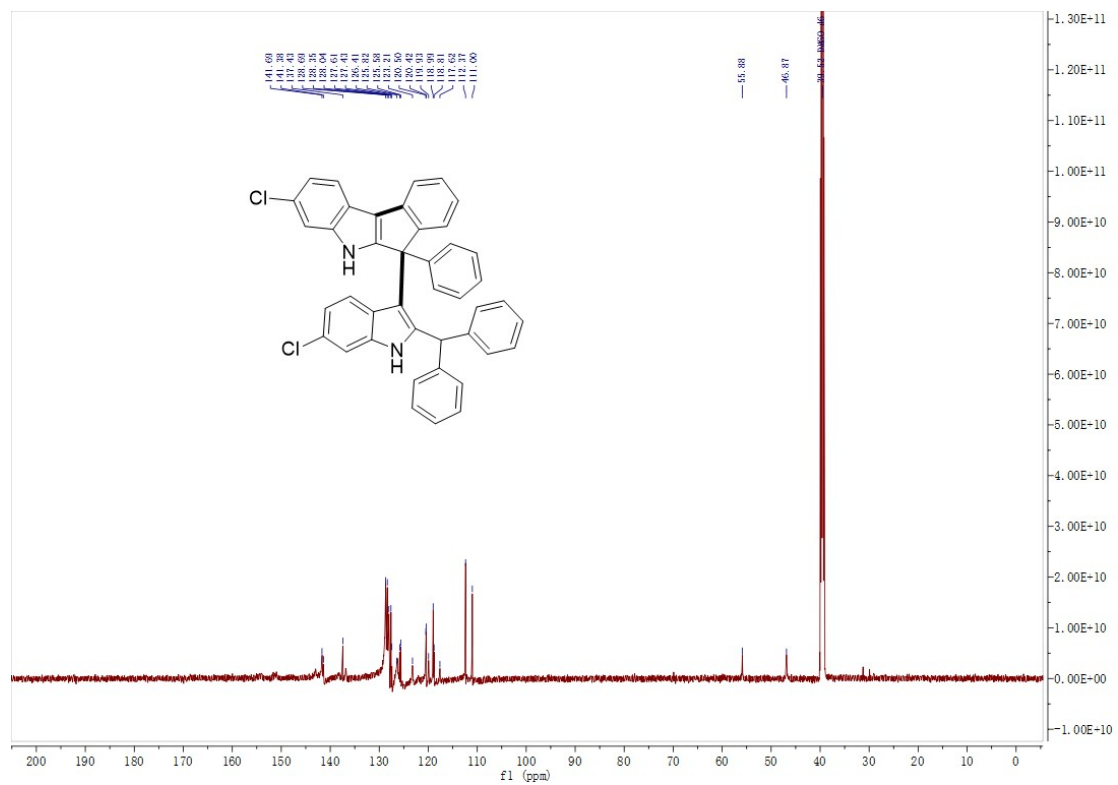

3h

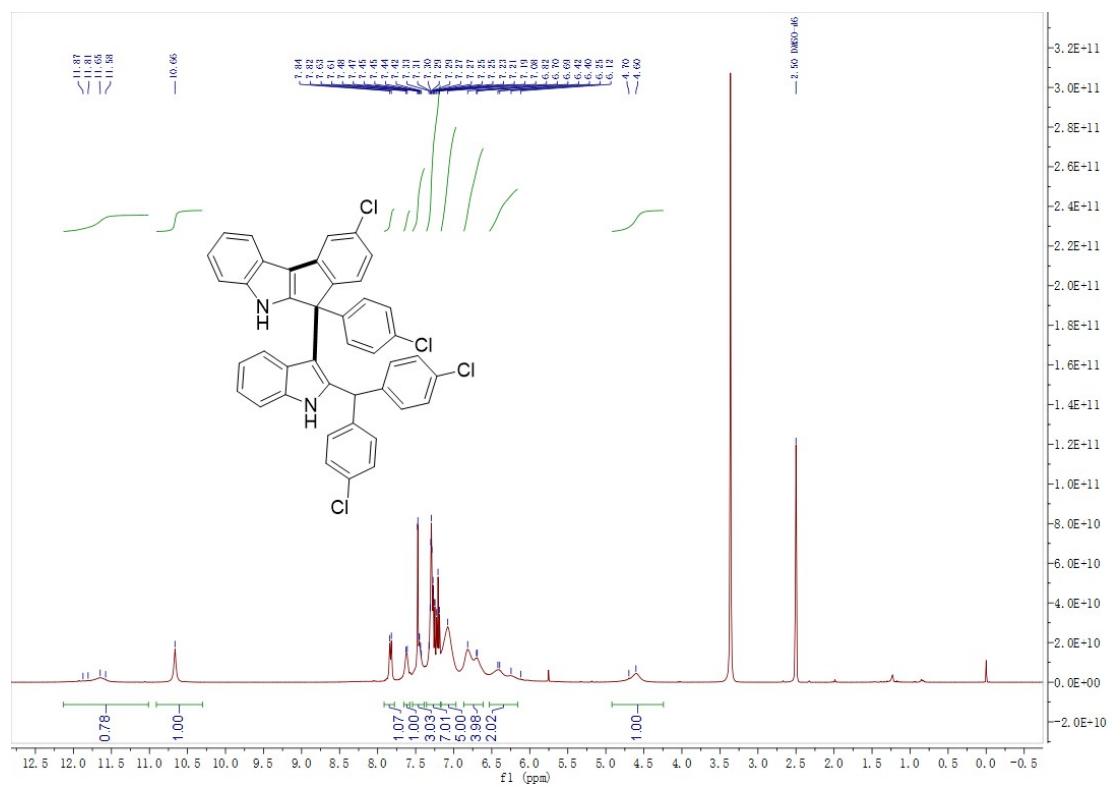







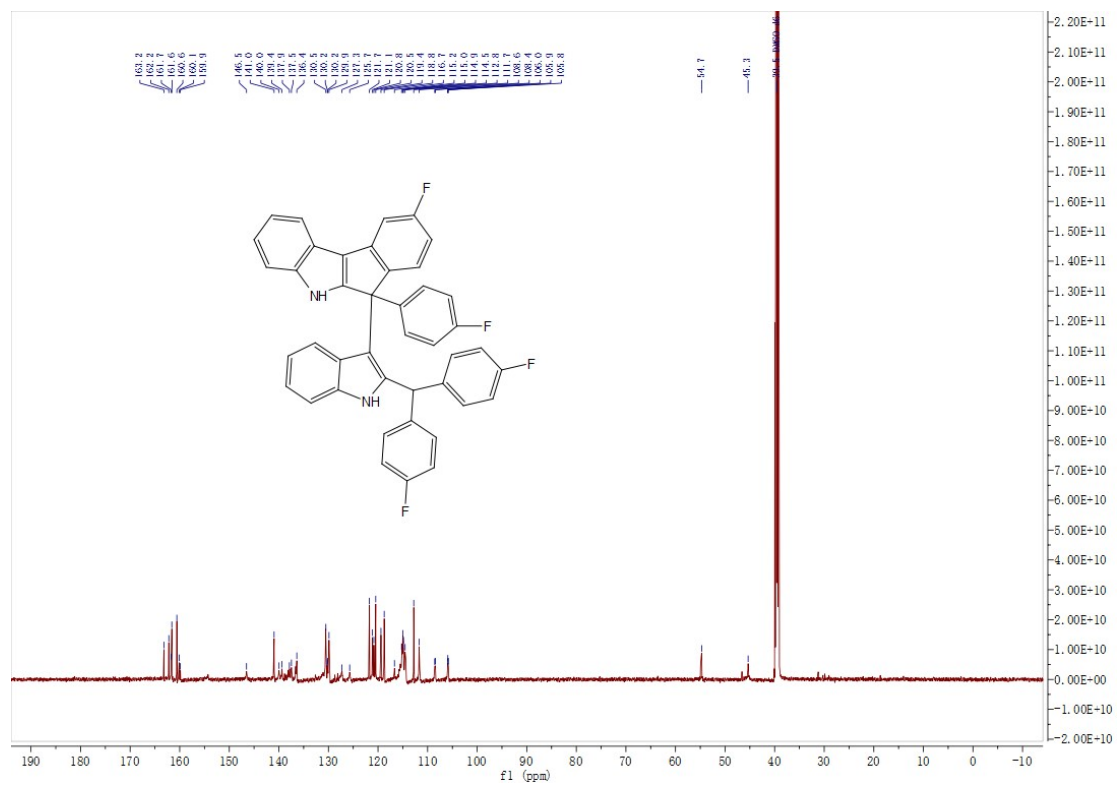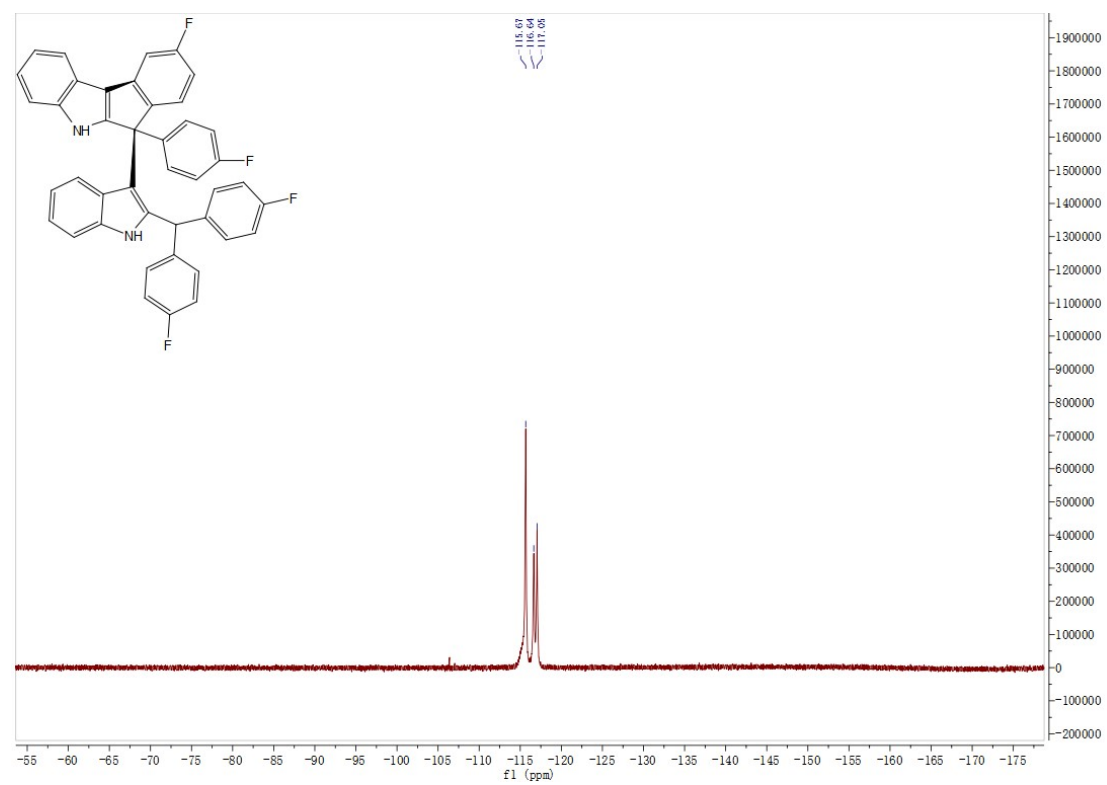

3j

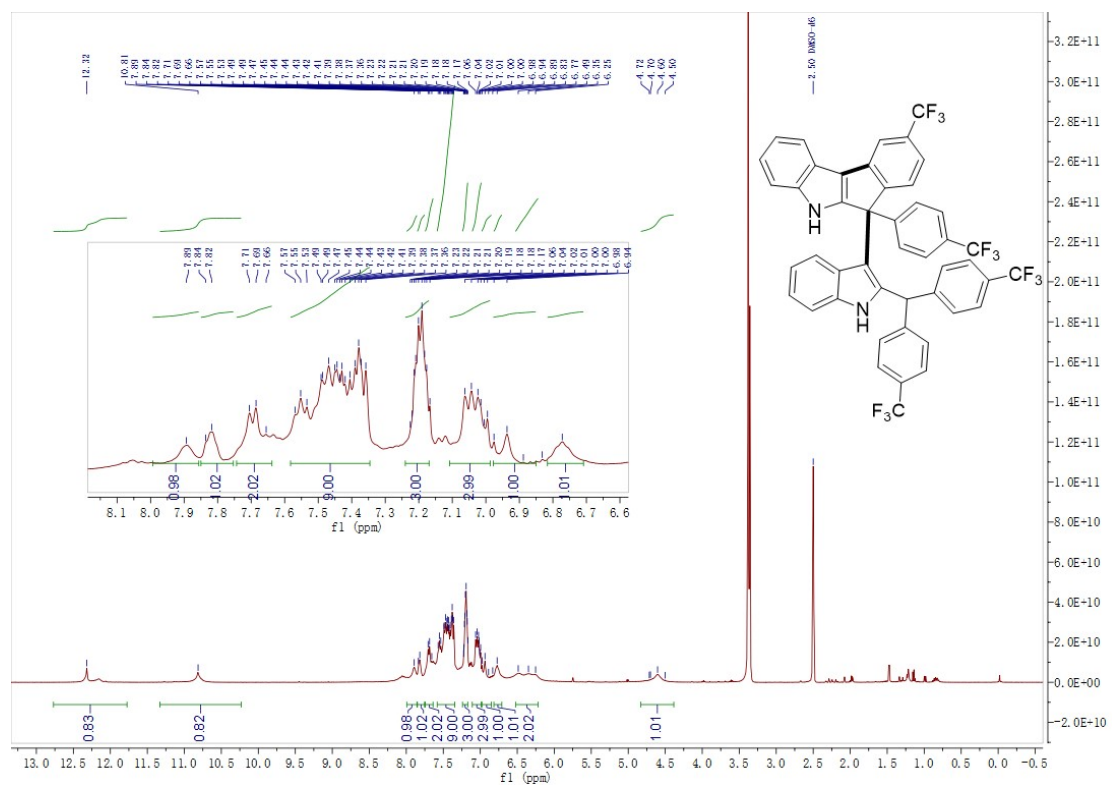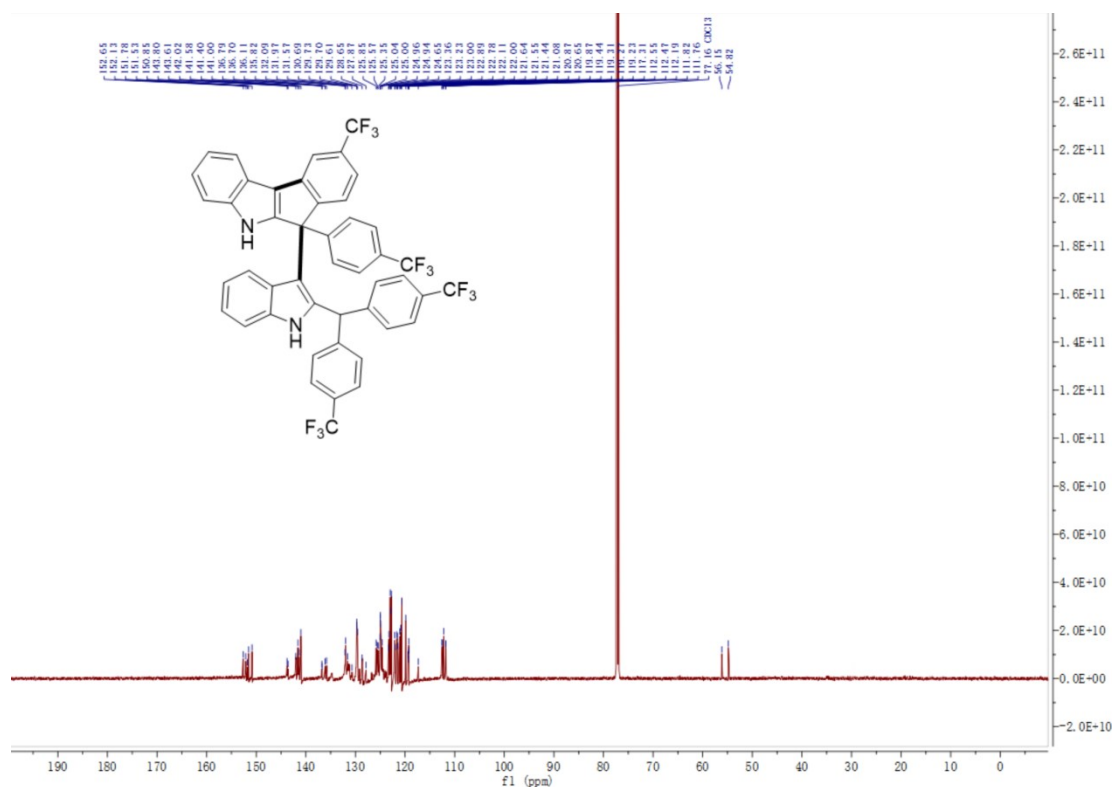

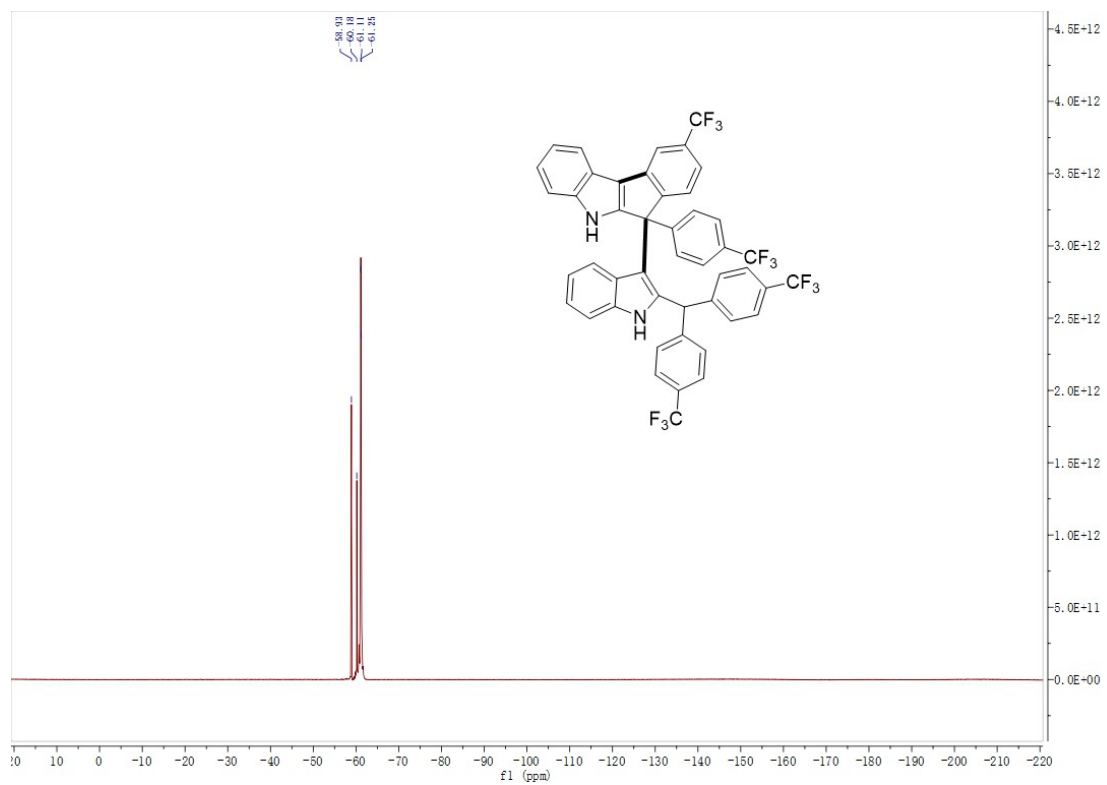

3k

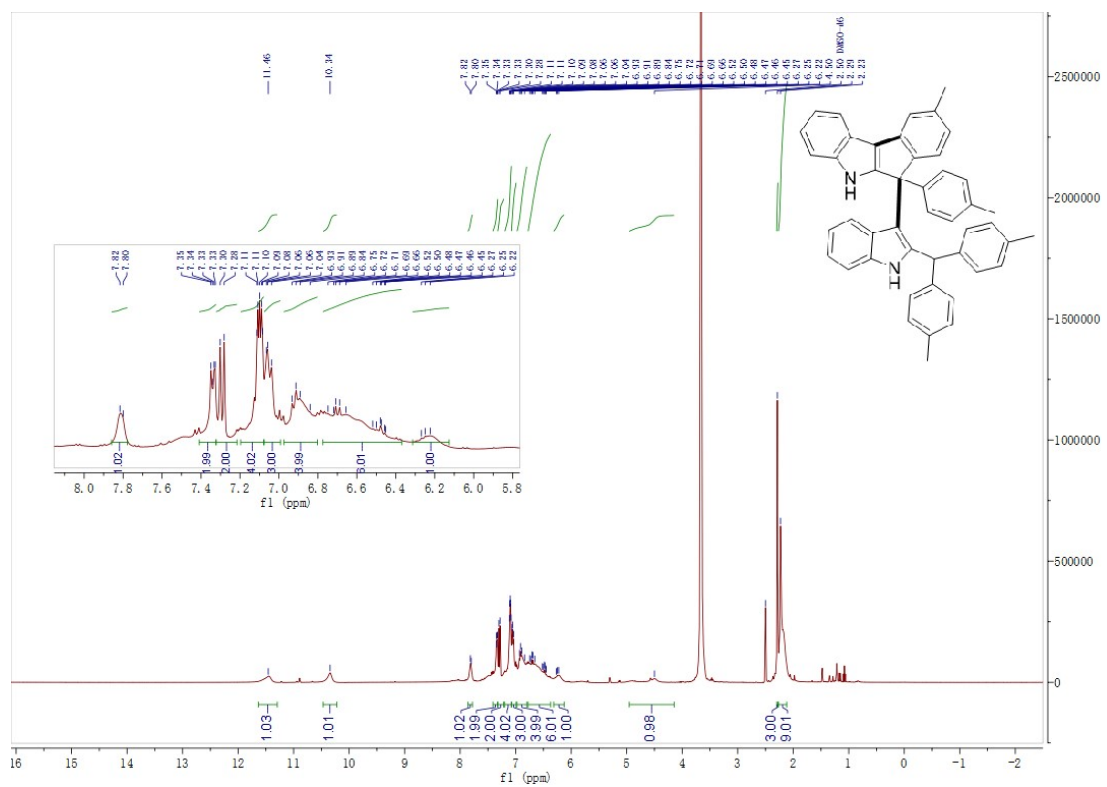

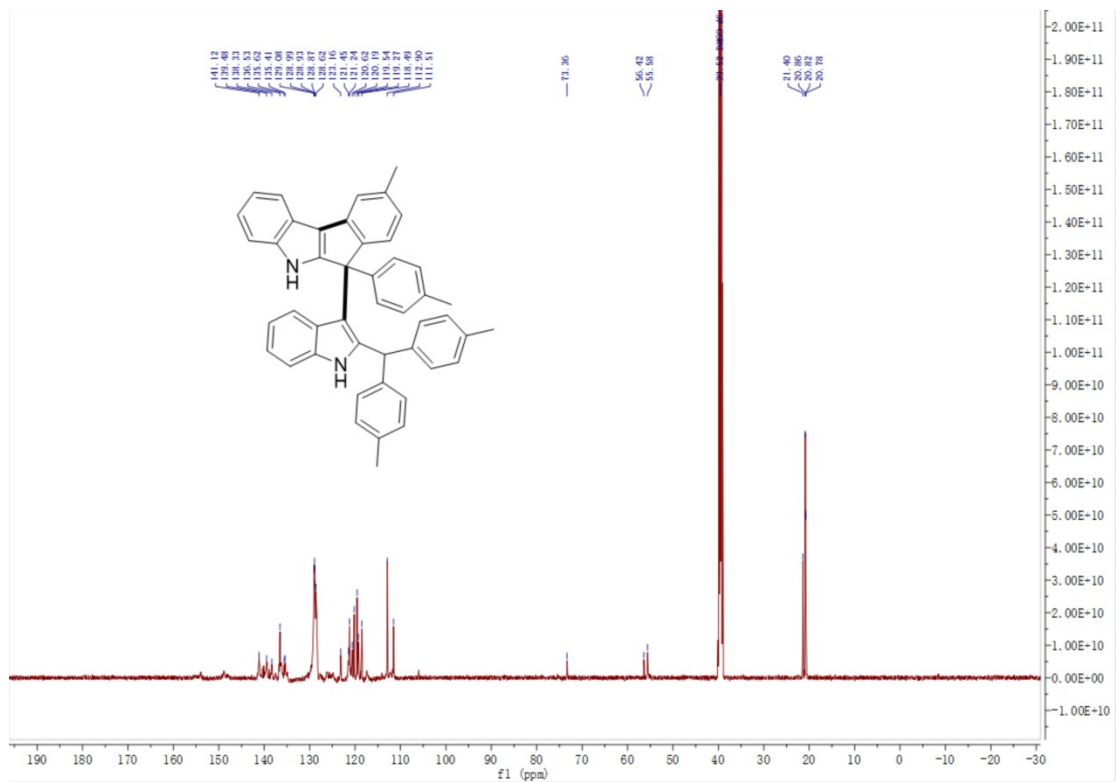

31

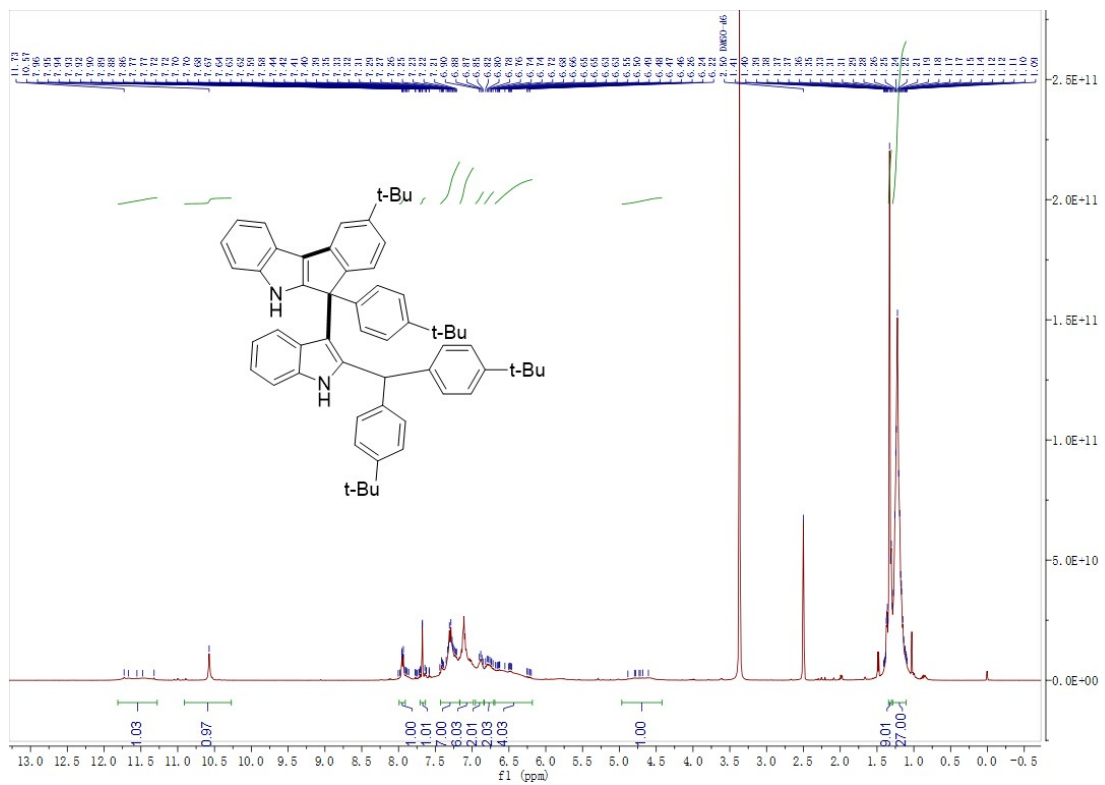

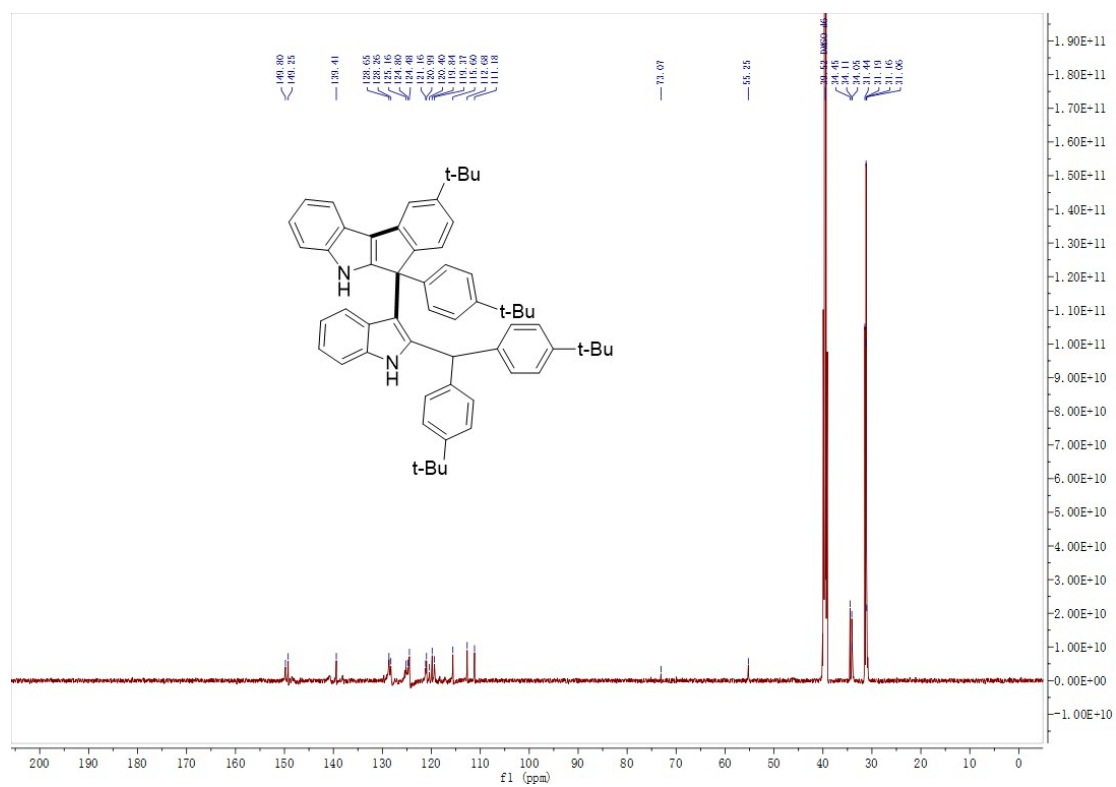

3m

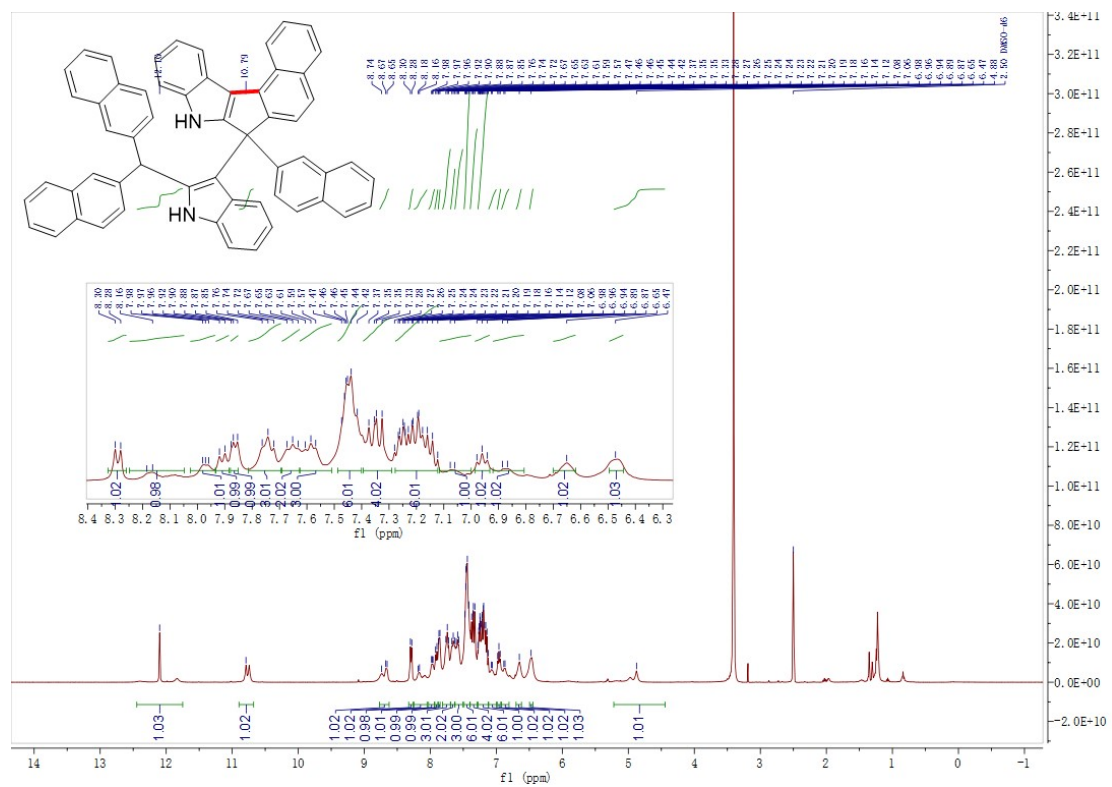

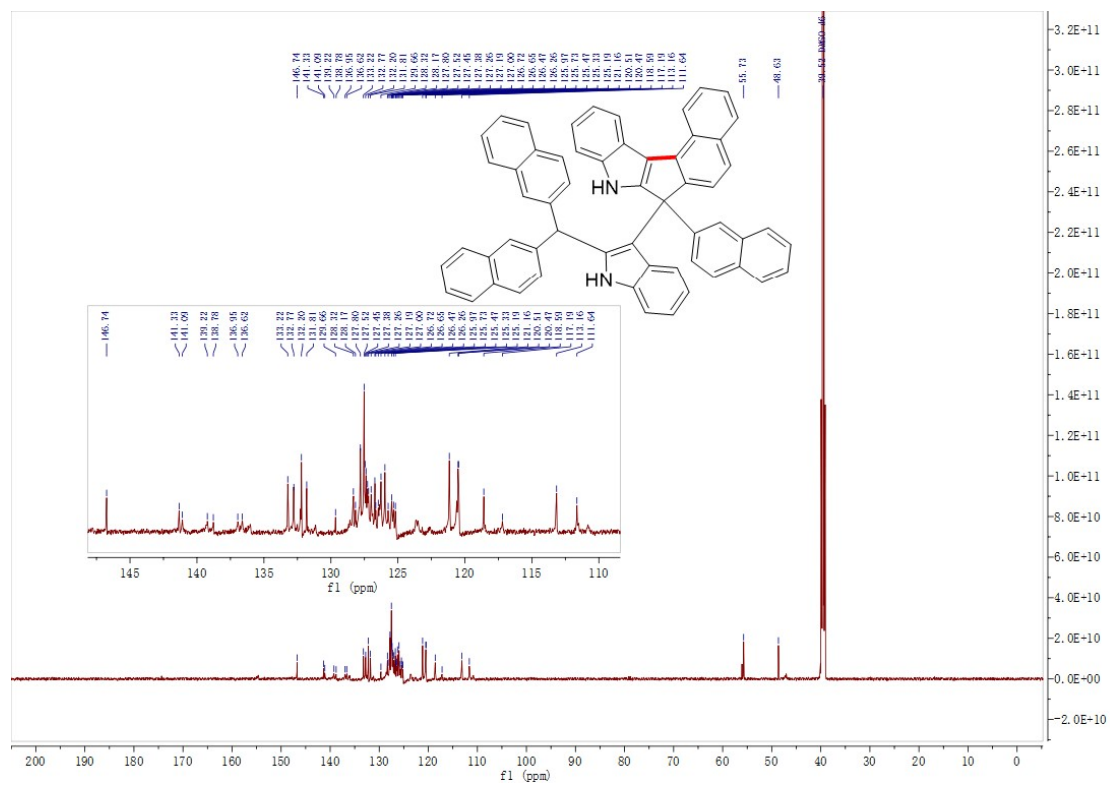

3r

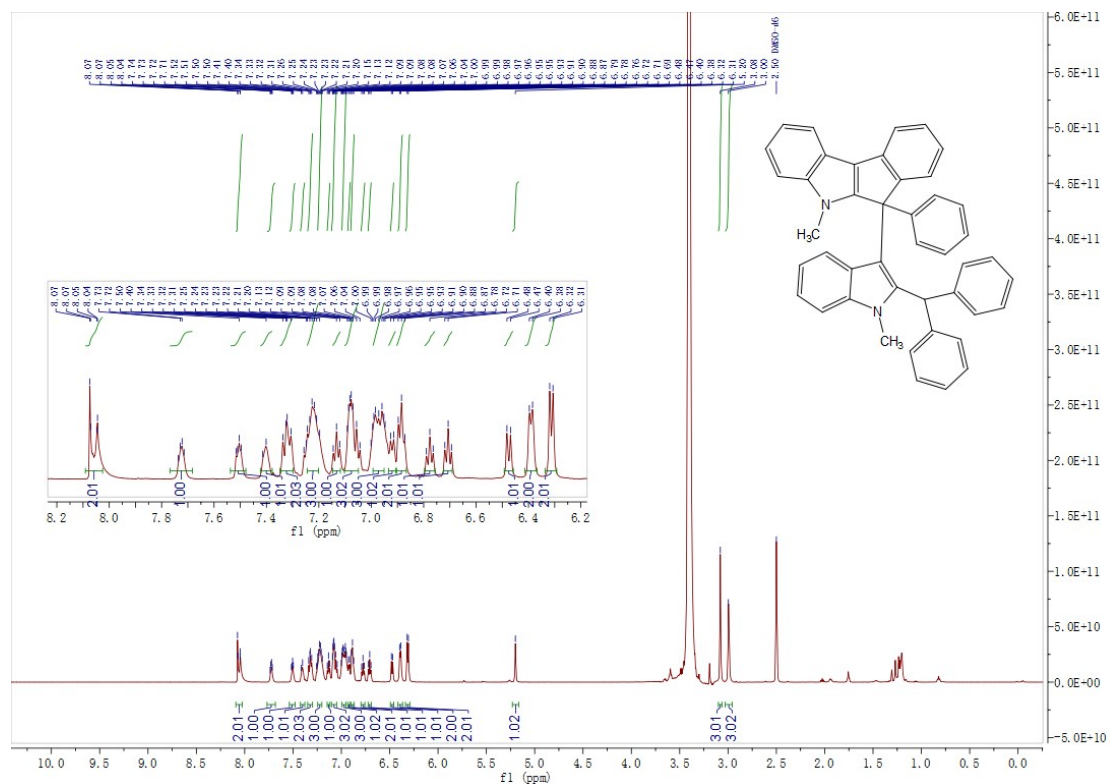



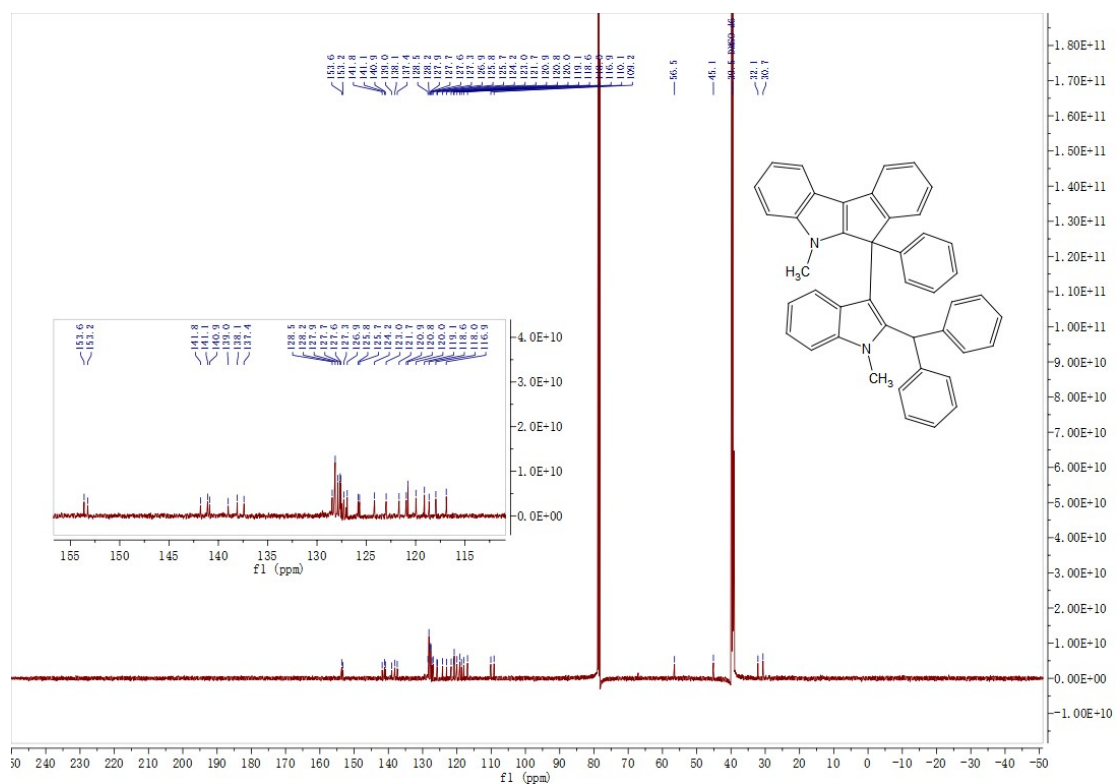

### Crystallographic Data for Compounds 3c & 3j

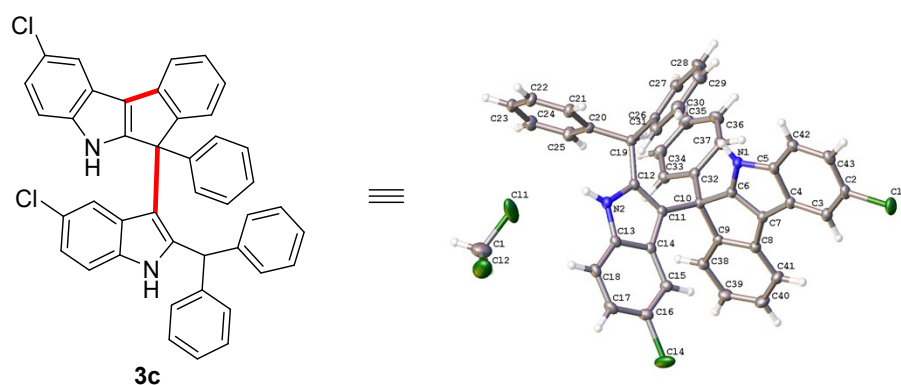

The ellipsoid was drawn at the 50% probability level.

The crystal structure of 3c has been deposited at the Cambridge Crystallographic Data Centre and allocated the deposition number: CCDC 2095611.

**Table S2** Crystal data and structure refinement for 3c.

|                     |                                                                |
|---------------------|----------------------------------------------------------------|
| Identification code | mj21120_0m                                                     |
| Empirical formula   | C <sub>43</sub> H <sub>30</sub> Cl <sub>2</sub> N <sub>2</sub> |
| Formula weight      | 716.49                                                         |
| Temperature         | 193 K                                                          |
| Wavelength          | 1.34139 Å                                                      |
| Crystal system      | Monoclinic                                                     |

|                                   |                                             |                  |
|-----------------------------------|---------------------------------------------|------------------|
| Space group                       | P 1 21/n 1                                  |                  |
| Unit cell dimensions              | a = 13.9191(4) Å                            | a= 90°           |
|                                   | b = 12.8360(4) Å                            | b= 106.3160(10)° |
|                                   | c = 20.3504(6) Å                            | γ= 90°           |
| Volume                            | 3489.49(18) Å <sup>3</sup>                  |                  |
| Z                                 | 4                                           |                  |
| Density (calculated)              | 1.364 Mg/m <sup>3</sup>                     |                  |
| Absorption coefficient            | 2.186 mm <sup>-1</sup>                      |                  |
| F(000)                            | 1480                                        |                  |
| Crystal size                      | 0.07 x 0.06 x 0.05 mm <sup>3</sup>          |                  |
| Theta range for data collection   | 2.996 to 54.966Å                            |                  |
| Index ranges                      | -16<=h<=16, -15<=k<=14, -24<=l<=24          |                  |
| Reflections collected             | 30275                                       |                  |
| Independent reflections           | 6596 [R(int) = 0.0572]                      |                  |
| Completeness to theta = 53.594?   | 99.5 %                                      |                  |
| Absorption correction             | Semi-empirical from equivalents             |                  |
| Max. and min. transmission        | 0.7508 and 0.5394                           |                  |
| Refinement method                 | Full-matrix least-squares on F <sup>2</sup> |                  |
| Data / restraints / parameters    | 6596 / 0 / 442                              |                  |
| Goodness-of-fit on F <sup>2</sup> | 1.035                                       |                  |
| Final R indices [I>2sigma(I)]     | R1 = 0.0497, wR2 = 0.1263                   |                  |
| R indices (all data)              | R1 = 0.0574, wR2 = 0.1325                   |                  |
| Extinction coefficient            | n/a                                         |                  |
| Largest diff. peak and hole       | 0.722 and -0.726 e.Å <sup>-3</sup>          |                  |



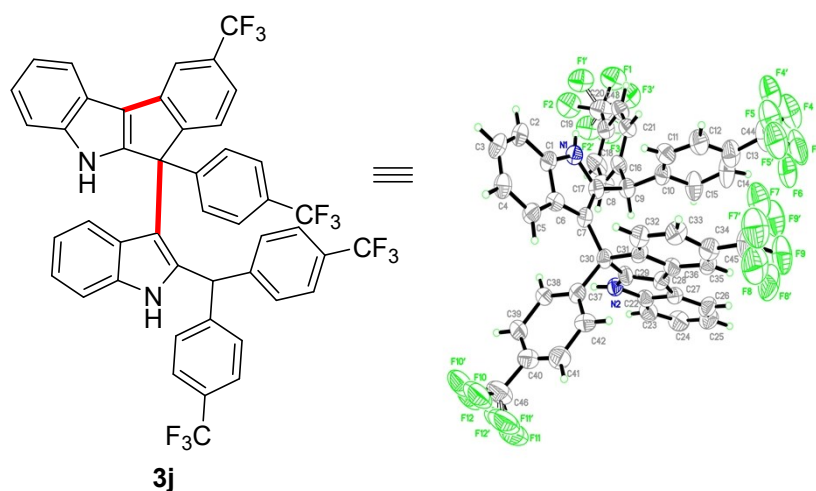

The ellipsoid was drawn at the 50% probability level.

The crystal structure of **3j** has been deposited at the Cambridge Crystallographic Data Centre and allocated the deposition number: CCDC 2100661.

**Table S3** Crystal data and structure refinement for **3j**.

|                                   |                                                                |                        |
|-----------------------------------|----------------------------------------------------------------|------------------------|
| Identification code               | exp_12297_sq                                                   |                        |
| Empirical formula                 | C <sub>46</sub> H <sub>26</sub> F <sub>12</sub> N <sub>2</sub> |                        |
| Formula weight                    | 178.21                                                         |                        |
| Temperature                       | 293(2) K                                                       |                        |
| Wavelength                        | 1.54184 Å                                                      |                        |
| Crystal system, space group       | Triclinic, P-1                                                 |                        |
| Unit cell dimensions              | a = 12.1173(8) Å                                               | alpha = 78.960(4) deg. |
|                                   | b = 13.9790(9) Å                                               | beta = 80.192(5) deg.  |
|                                   | c = 17.7969(7) Å                                               | gamma = 68.596(6) deg. |
| Volume                            | 2738.0(3) Å <sup>3</sup>                                       |                        |
| Z, Calculated density             | 1, 0.108 Mg/m <sup>3</sup>                                     |                        |
| Absorption coefficient            | 0.064 mm <sup>-1</sup>                                         |                        |
| F(000)                            | 94                                                             |                        |
| Crystal size                      | 0.130 x 0.120 x 0.100 mm                                       |                        |
| Theta range for data collection   | 3.430 to 67.248 deg.                                           |                        |
| Limiting indices                  | -14 ≤ h ≤ 13, -16 ≤ k ≤ 14, -21 ≤ l ≤ 15                       |                        |
| Reflections collected / unique    | 17778 / 9769 [R(int) = 0.0279]                                 |                        |
| Completeness to theta = 67.248    | 99.5 %                                                         |                        |
| Refinement method                 | Full-matrix least-squares on F <sup>2</sup>                    |                        |
| Data / restraints / parameters    | 9769 / 700 / 653                                               |                        |
| Goodness-of-fit on F <sup>2</sup> | 1.289                                                          |                        |
| Final R indices [I > 2σ(I)]       | R1 = 0.0993, wR2 = 0.3321                                      |                        |
| R indices (all data)              | R1 = 0.1291, wR2 = 0.3679                                      |                        |
| Extinction coefficient            | n/a                                                            |                        |
| Largest diff. peak and hole       | 0.348 and -0.378 e.Å <sup>-3</sup>                             |                        |
